# Supplementary material for: Adaptation of redox metabolism in drug-tolerant persister cells is a vulnerability to prevent relapse in pancreatic cancer
Source: Research Square preprint supplement (doi:10.21203/rs.3.rs-6170765/v1), 2025-03-20
Supplement: Supplementary file 1 [file 3d1a1b3ed18967e628e7ba69.docx]

**SUPPLEMENTARY INFORMATION**

**Adaptation of redox metabolism in drug-tolerant persister cells**

**is a vulnerability to prevent relapse in pancreatic cancer**

Nadine Abdel Hadi1, Gabriela Reyes-Castellanos1, Tristan Gicquel1, Scarlett Gallardo-Arriaga1, Emeline Boet2, Jean-Emmanuel Sarry2, Rawand Masoud1, Juan Iovanna1, Alice Carrier1,*

1Aix Marseille Univ, Inserm, CNRS, Institut Paoli-Calmettes, Centre de Recherche en Cancérologie de Marseille (CRCM), Marseille, France.

2Centre de Recherches en Cancérologie de Toulouse, Université de Toulouse, Inserm, CNRS, Toulouse, France.

*Corresponding author, [alice.carrier@inserm.fr.](mailto:Email:%20alice.carrier@inserm.fr.%20)

**Supplementary Figures: 8**


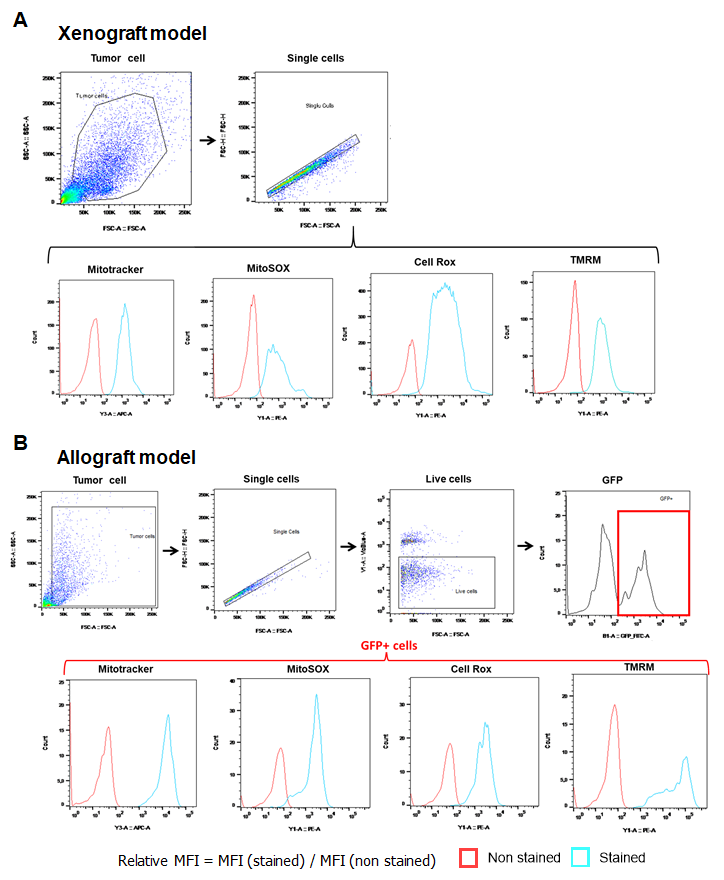


**Figure S1. Representative flow cytometry plots of tumor cell populations from xenograft and allograft mouse models (related to Figures 1 and 2). (A)** In xenograft model, tumor cells are separated from debris by Forward Scatter Area (FSC-A)/Side Scatter Area (SSC-A), and doublets are excluded by FSC-A and FSC-height (FSC-H) dot plots. Mitotracker Deep Red, MitoSOX Red, CellROX Orange, and TMRM histograms are done by gating on single cells**. (B)** In allograft model, the histograms are done by gating on GFP+ cells (KPCluc2 cancer cells) after gating on live cells (the negative fraction for VioBlue-A staining).

**
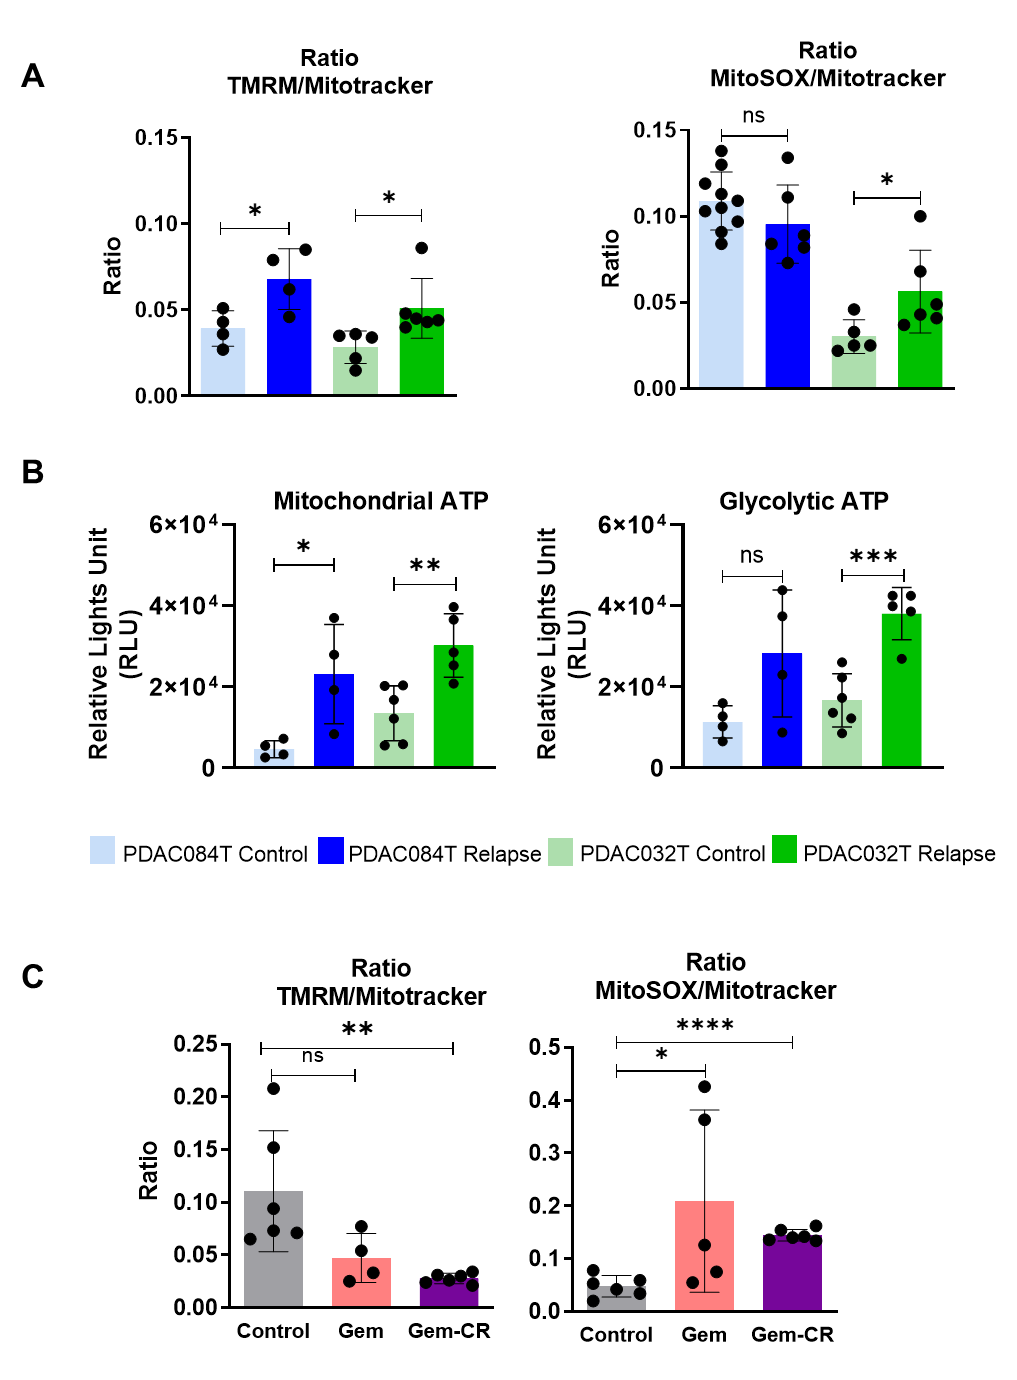
**

**Figure S2. Mitochondrial and redox metabolic reprogramming in relapsed PDAC xenografts and allografts (related to Figures 1 and 2).** TMRM (measuring mitochondrial membrane potential) and MitoSOX (measuring mitochondrial superoxide anions) values were normalized by Mitotracker (measuring mitochondrial mass) values in relapsed xenografts (**A**), and relapsed allografts (**C**). **(B)** ATP production was measured in the presence of oligomycin (left) or 2DG (right) *in vitro* on dissociated relapsed xenografts, allowing to calculate mitochondrial and glycolytic ATP percentages shown in Figure 1D.


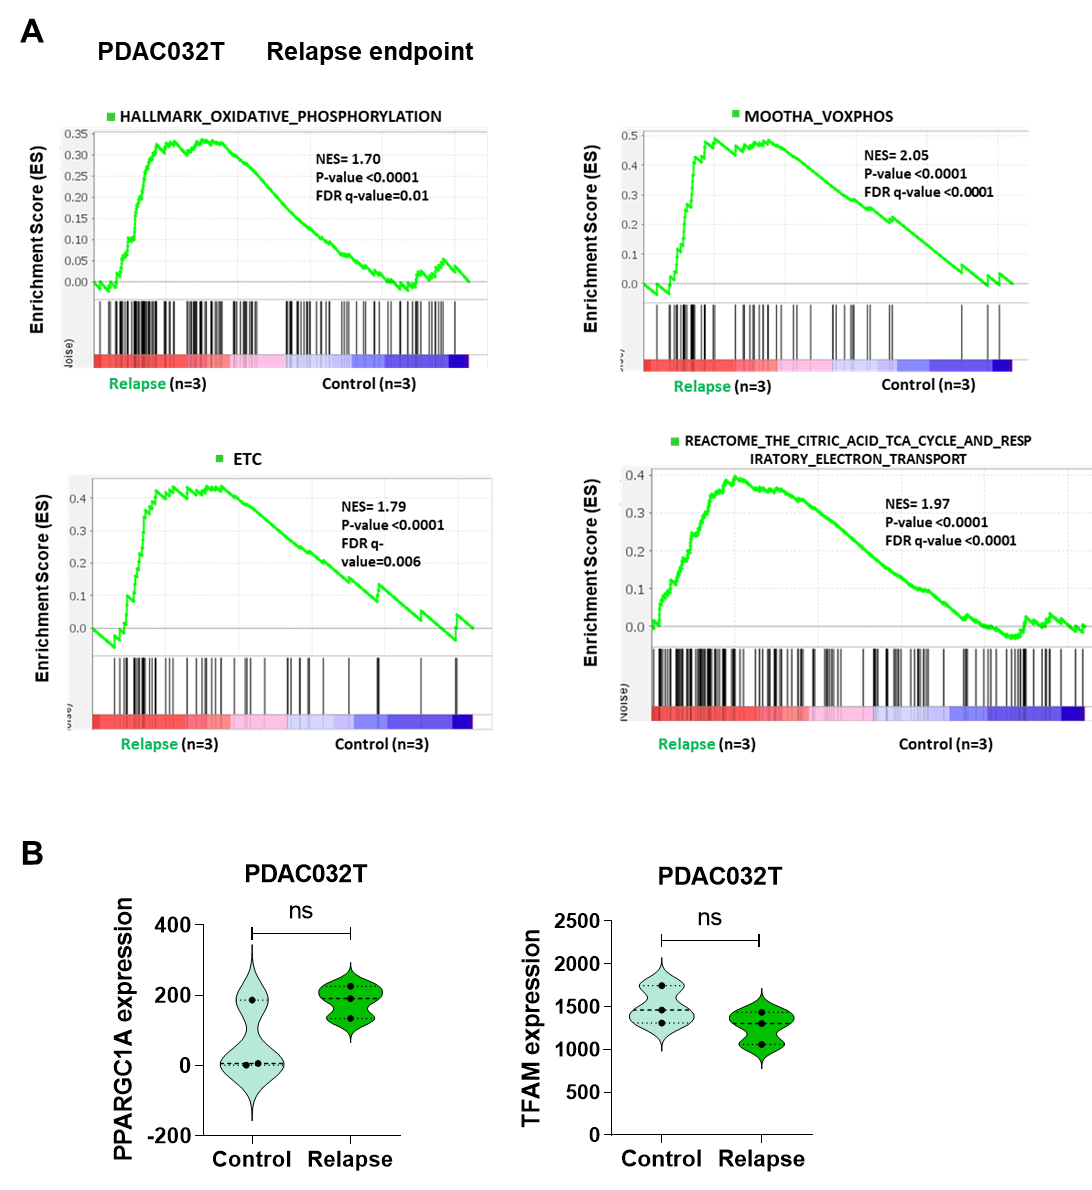


**Figure S3.** **Gene set enrichment analysis (GSEA) on RNA-seq data from PDAC032T xenografts at relapse endpoint(related to Figure 1). (A)** Four mitochondrial signatures were assessed by GSEA: Oxidative phosphorylation, MOOTHA_VOXPHOS, ETC, and Reactome TCA cycle and respiratory electron transport. Significant enrichments are observed in PDAC032T relapsed tumors versus control. The top portion of each panel shows the normalized enrichment scores (NES) for each signature; the bottom portion of the plot indicates the value of the ranking metric moving down the list of ranked genes. **(B)** *PPARGC1A* and *TFAM* expression in PDAC032T relapsed tumors versus control based on RNA sequencing. *P < 0.05; **P < 0.01; ***P < 0.001. ns, not significant.


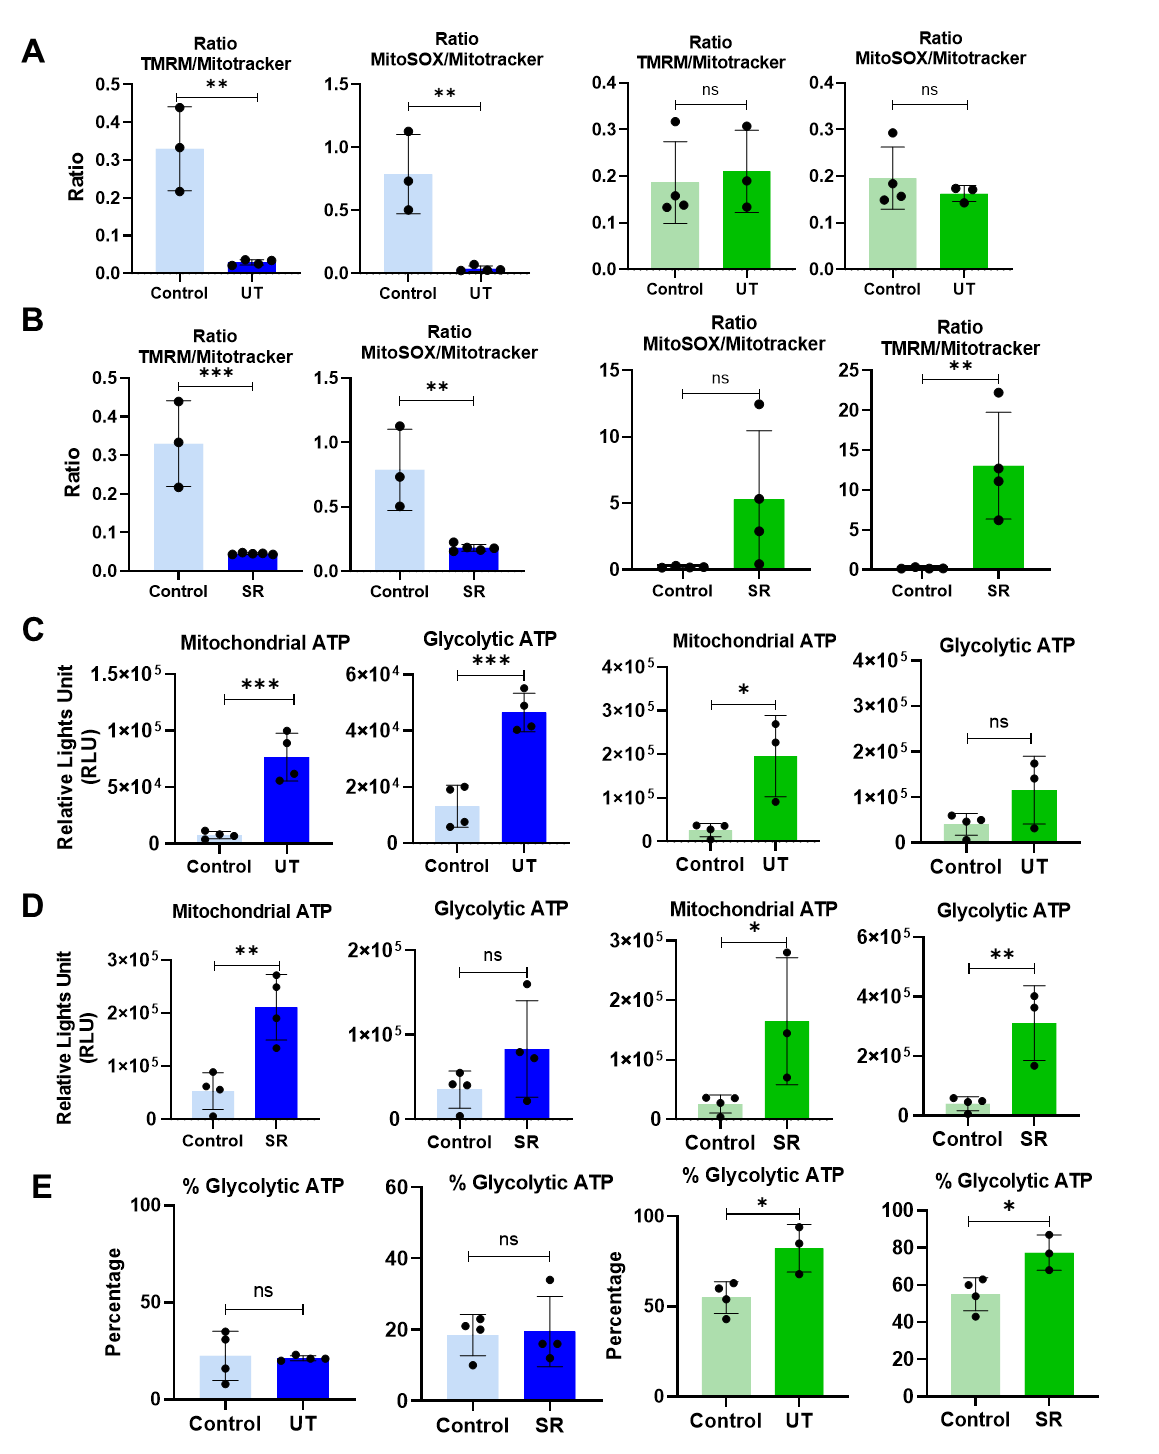


**Figure S4. Mitochondrial and redox metabolic reprogramming occurs during treatment-induced complete regression in PDAC xenografts (related to Figure 3). (A-B)** TMRM and MitoSOX values were normalized by Mitotracker values in xenografts PDAC084T (left) and PDAC032T (right), under treatment (UT, **A**) and at start of relapse (SR, **B**). **(C-D)** ATP production was measured in the presence of oligomycin or 2DG *in vitro* on dissociated relapsed xenografts PDAC084T (left) and PDAC032T (right), under treatment (UT, **C**) and at start of relapse (SR, **D**). **(E)** Percentages of glycolytic ATP in PDAC084T (left) and PDAC032T (right), under treatment (UT) and at start of relapse (SR).


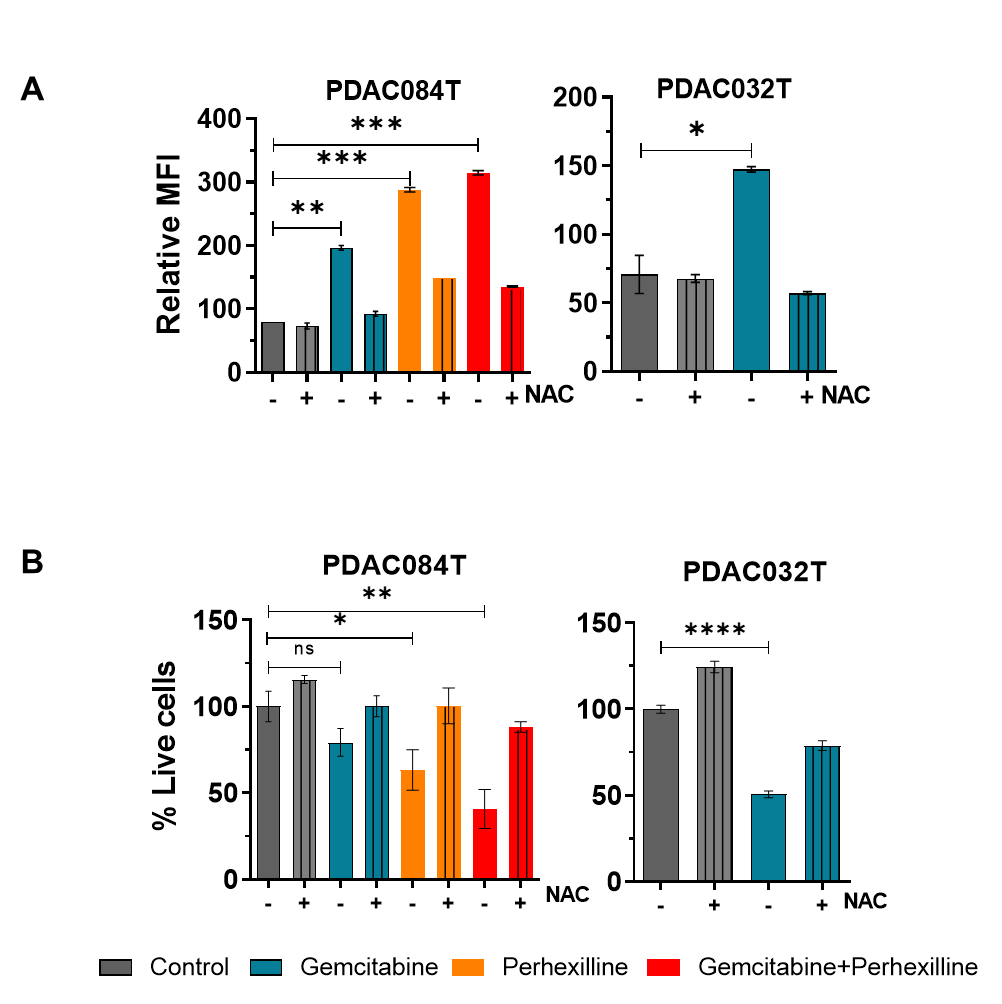


**Figure S5. Chemotherapy induces ROS increase and redox-driven loss of cell viability in PDAC cells *in vitro* (related to Figure 3). (A)** Total ROS level was measured by flow cytometry with the CellROX orange probe in PDAC084T and PDAC032T cells cultured *in vitro*, after 24 hours treatment with gemcitabine (1 µM), or perhexiline (7 µM), or combination at same concentrations. We used DMSO (0.05%) as vehicle for the controls. Supplementation with the antioxidant N-acetylcysteine (NAC) at 2.5 mM was performed for 24 hours at the same time as the treatments. Data are expressed as mean of duplicates ± SEM and are representative of three independent experiments. To calculate p values, Unpaired T-test was used. **(B)** Percentage of live cells treated for 24 hours with gemcitabine (1 µM), perhexiline (7 µM) or the combination in PDAC084T, and with gemcitabine alone in PDAC032T. Cell viability was determined by Crystal violet assay. Data are means of triplicates ± SEM, and are representative of three independent experiments. Unpaired T-test was used. *, **, *** and **** correspond to p<0.05, 0.01, 0.001, and 0.0001, respectively; ns: non-significant difference.


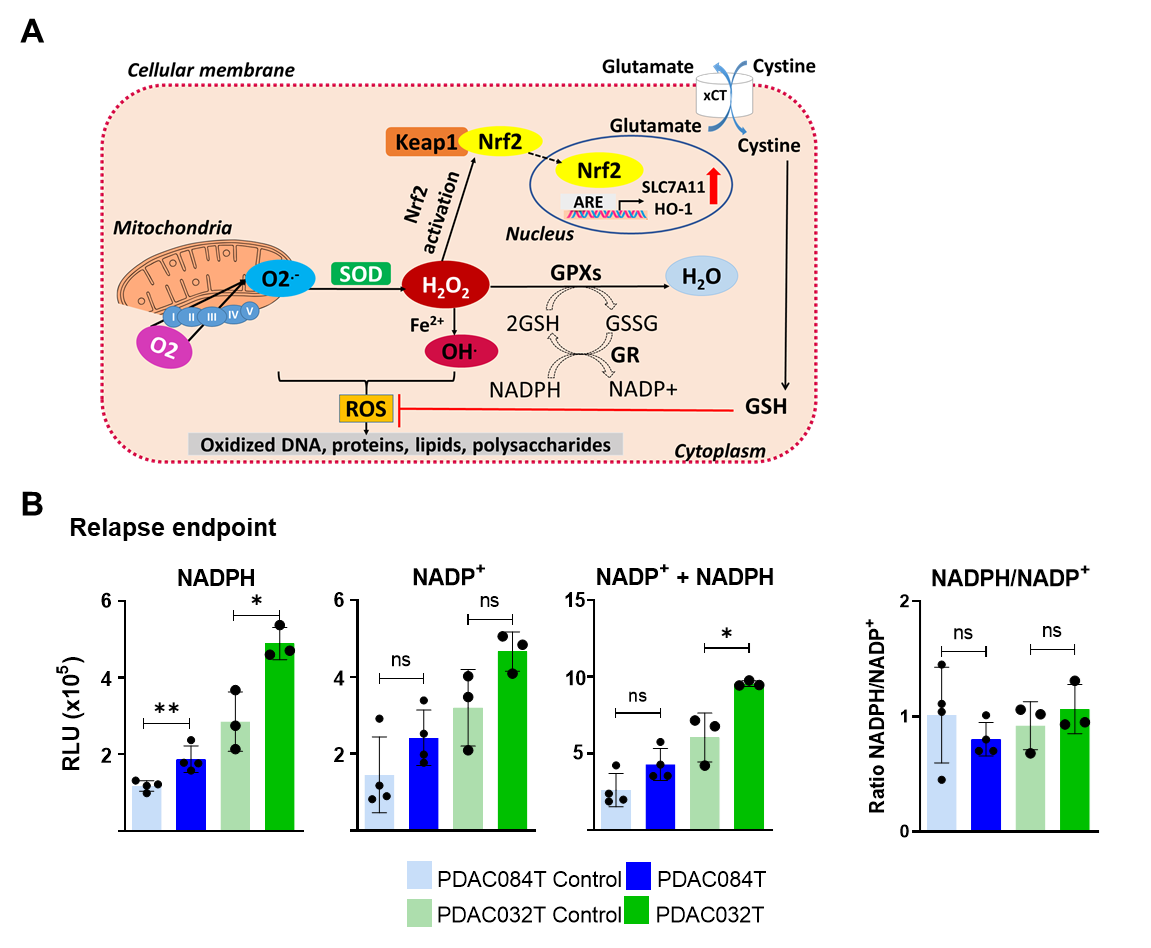


**Figure S6. Antioxidant defenses in xenografts at relapse end point (related to Figure 4). (A)** Simplified schematic representation of ROS generation and enzymatic and non- enzymatic antioxidant defenses. Superoxide anion (O2.-) is mainly produced by the mitochondrial ETC complexes by partial reduction of molecular oxygen (O2). Superoxide is dismutated into hydrogen peroxide (H2O2) by superoxide dismutases (SOD). H2O2 is converted to water (H2O) by glutathione peroxidases (GPX). Via the Fenton reaction with metal ions Fe2+ or Cu+, H2O2 is further reduced to highly reactive hydroxyl radical (OH⋅), thereby damaging biological macromolecules such as DNA, lipids, and proteins. H2O2 is the main player in redox homeostasis, and can induce the activation of the antioxidant transcription factor Nrf2 through dissociation of the Nrf2-KEAP1 complex, phosphorylation of Nrf2, and its nuclear translocation. In the nucleus, Nrf2 promotes transcription of multiple antioxidant genes such as *SLC7A11* and *HO-1* by binding to the antioxidant responsive elements (ARE) in the promoter region of target genes. Via its entry into cells through theglutamate/cystine antiporter xCT encoded by the *SLC7A11* gene, cysteine can enhance GSH production which is a tripeptide glutamate-cysteine-glycine.The antioxidant function of GSH is mediated by two enzymes: GPX and GR. GPX allows the reduction of H2O2 by the oxidation of GSH (reduced glutathione) to GSSG (oxidized glutathione). The GSSG is subsequently reduced to GSH by GR at the expense of NADPH used as a cofactor. **(B)** NADPH, NADP+ (oxidized form of NADPH), and total NADP+ + NADPH levels were measured using the NADP/NADPH-Glo™ Assay kit, and the ratio NADPH/NADP+ was calculated.


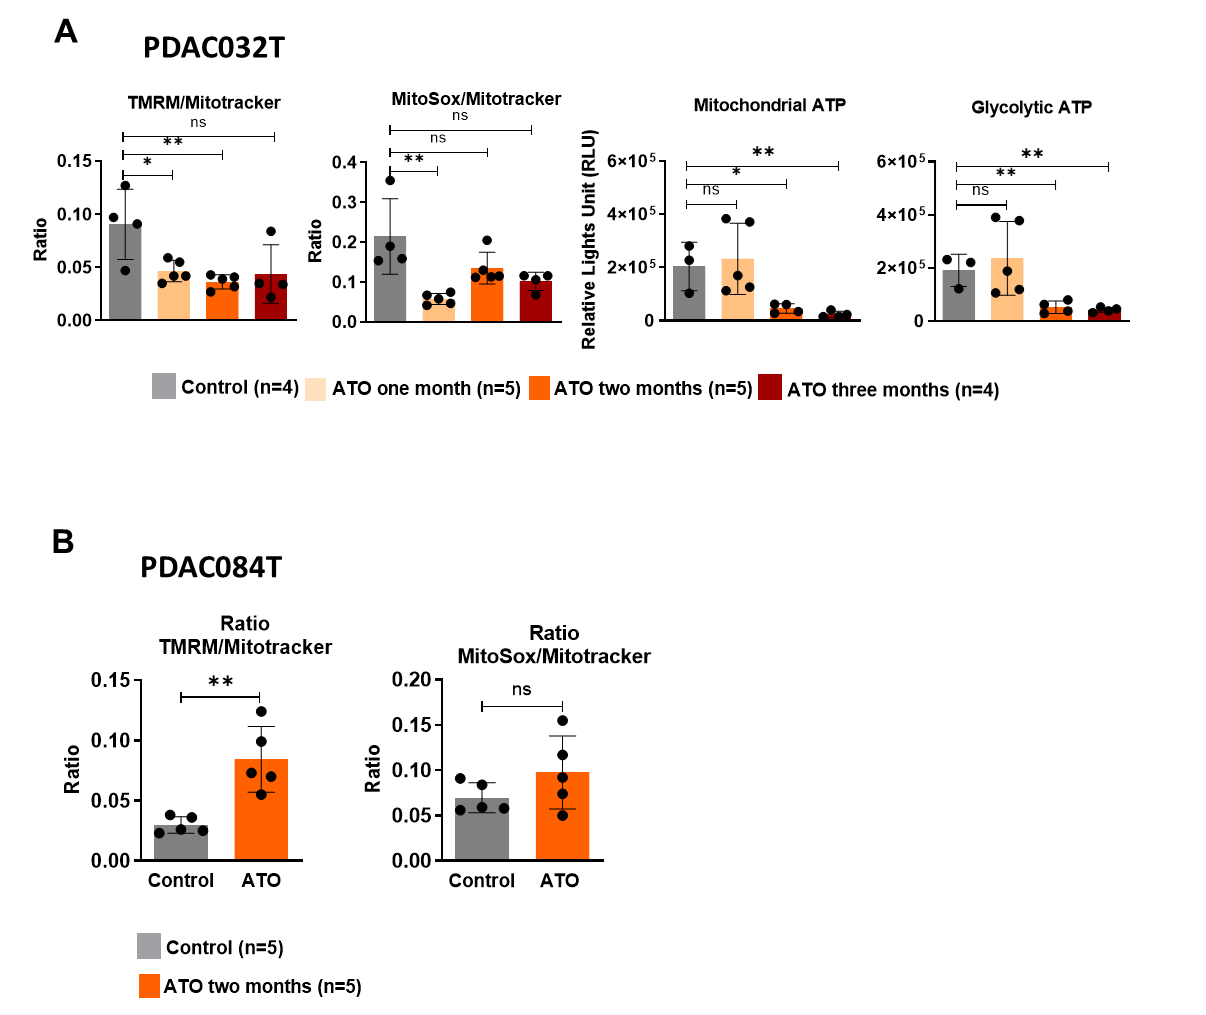


**Figure S7. Mitochondrial metabolic reprogramming during ATO treatment in PDAC xenografts (related to Figure 5).** **(A-B)** TMRM and MitoSOX values were normalized by Mitotracker values in xenografts PDAC032T (**A, left**) and PDAC084T (**B**), and ATP production was measured in the presence of oligomycin or 2DG *ex vivo* on dissociated PDAC032T xenografts (**A, Right**).


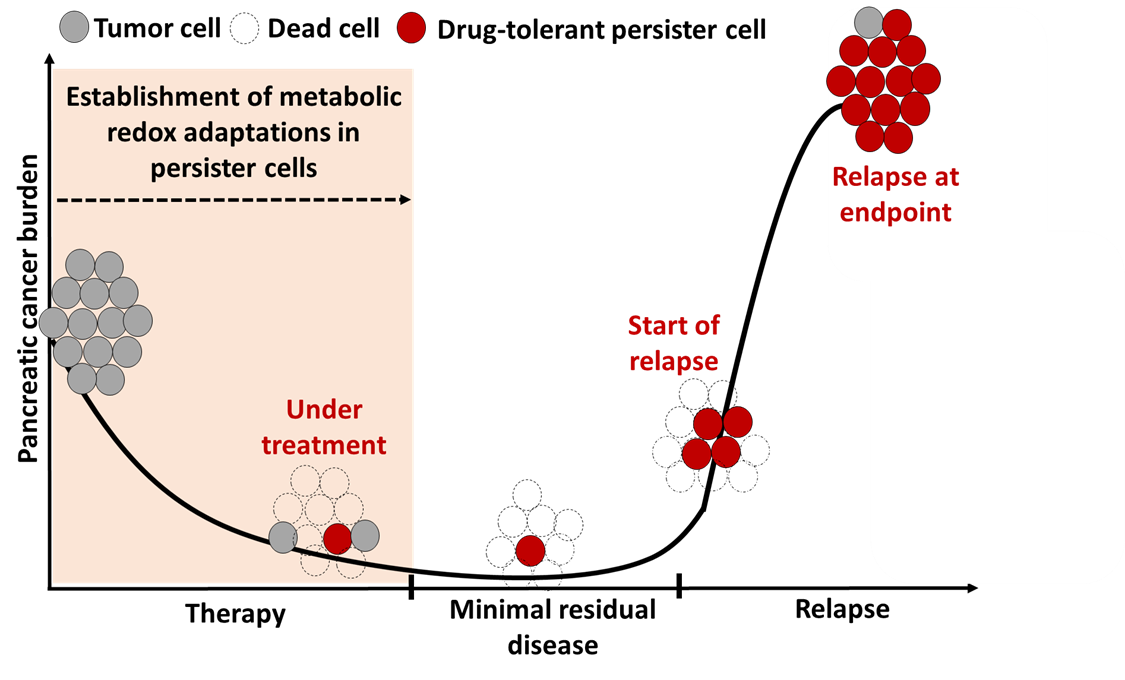


**Figure S8. Working model of treatment-induced acquired resistance in PDAC.** In tumors that respond to therapy, most tumor cells die (dead cells) during treatment, ensuring therapy-induced regression. However, some drug-tolerant persister (DTP) cancer cells survive during regression, through the establishment of metabolic (mitochondrial and redox) adaptations. They are maintained in the tumor scar and are associated with what is known as minimal residual disease. When these DTP cancer cells resume their proliferation, they are at the origin of the regrowth and the relapse of the tumor. Metabolic changes are observed in DTP cells at all stages analyzed and not just in the tumor after relapse, supporting that they are induced by therapeutic treatment and not by tumor growth after relapse.
