# Supplementary material for: Adaptation of redox metabolism in drug-tolerant persister cells is a vulnerability to prevent relapse in pancreatic cancer
Source: Research Square preprint supplement (doi:10.21203/rs.3.rs-6170765/v1), 2025-03-20
Supplement: Supplementary file 2 [file a52bf2e33f78e8a367d044f4.xlsx]

## Sheet: PDAC084T Relapse endpoint (B)
Nrf2									HO-1									SLC7a11							Recap SLC7a11 (n=2)						GPX4
Experiment 1			Experiment 2			Experiment 3			Experiment 1			Experiment 2			Experiment 3			Experiment 1				Experiment 2					Mean of triplicata			Mean of triplicata	Experiment 1				Experiment 2
Sample ID	Relative Quantity (dRn)	Mean (wells)	Sample ID	Relative Quantity (dRn)	Mean (wells)	Sample ID	Relative Quantity (dRn)	Mean (wells)	Sample ID	Relative Quantity (dRn)	Mean (wells)	Sample ID	Relative Quantity (dRn)	Mean (wells)	Sample ID	Relative Quantity (dRn)	Mean (wells)	Sample ID	Relative Quantity (dRn)	Mean (wells)		Sample ID	Relative Quantity (dRn)	Mean (wells)	n=1	NT1	1	n=1	R1	3.7	Sample ID	Relative Quantity (dRn)	Mean (wells)		Sample ID	Relative Quantity (dRn)	Mean (wells)
NT 1	1	1	NT1	1	1	NT1	1	1	NT 1	1	1	NT1	1	1	NT1	1	1	NT 1	1	1		NT 1	1	1		NT2	0.67769		R2	0.981773	NT 1	1	1		NT 1	1	1
	1			1			1			1			1			1			1				1		n=2	NT1	1		R3	2.03699		1				1
	1					NT7	0.77	0.7665		1		NT5	0.80137	0.715007	NT7	1.012	1.011		1							NT2			R4	1.07568		1				1
NT 2	0.60017	0.588607					0.763		NT 5		1.08404		0.73553			1.01		NT 2	0.82769	0.67769						NT5	0.20456	n=2	R1	0.627073	NT 2	0.561	0.561333		NT 5	0.84732	0.87721
	0.61976		NT5	0.6103	0.60383	NT8	0.728	0.73		1.05465			0.60812		NT 8	1.452	1.451		0.57764			NT 5	0.19363	0.20456		NT6	0.21546		R2	0.87211		0.562				0.9071
	0.54589			0.56006			0.732			1.11343		NT6	1.18699	1.19322		1.45			0.62774				0.21549			Mean	0.524428		R3	0.58957		0.561			NT 6	1.02799	1.05642
R1	1.0916	0.992777		0.64113		R5	1.561	1.561	R1	2.55007	2.41867		1.19945		R5	2.048	2.0455	R1	3.74881	14.8367		NT 6	0.20887	0.21546					R4	0.407223	R1	2.3104	2.33554			1.08486
	0.93854		NT6	0.97256	1.0062		1.562			2.43562						2.043							0.17708		SLC7a11 normalisation							2.36069			R4	1.123	1.1235
	0.94819			0.99933			1.56			2.27033		R1	1.87581	1.90655	R6	2.226	2.224		25.9245				0.26043				NT Mean of triplicata			Relapse Mean of triplicata	R2	2.035	1.60087			1.124
R2	0.937	0.937333		1.0467		R6	2.042	2.042	R2	3.0967	3.07352		1.97091			2.222		R2	1.02974	0.981773		R1	0.64173	0.627073	n=1	NT1	1.90684	n=1	GPX 1	7.05531		1.16673			R5	2.777	2.7775
	0.937		R1	1.11491	1.14203		2.042			2.9717			1.87292		R7	1.095	1.093		0.89364				0.61865			NT2	1.29225		GPX2	1.87209	R3	1.31438	1.23771			2.778
	0.938			1.12398		R7	1.706	1.706		3.15215		R2	2.46532	2.41085		1.091			1.02194				0.62084		n=2	NT1	1.90684		GPX 12	3.88422		1.16103			R6	0.524	0.5245
R3	0.52584	0.517323		1.1872			1.708		R3	2.40826	2.30772		2.45925		R8	1.74	1.7425	R3	2.17767	2.03699		R2	0.89091	0.87211		NT2			GPX 13	2.05115						0.525
	0.52301		R2	0.52897	0.54666		1.704			2.30607			2.30799			1.745			1.94691				0.85331			NT	0.390063	n=2	GPX 1	1.19573					R7	0.66732	0.738435
	0.50312			0.56435		R8	1.273	1.27267		2.20882		R3	2.09926	2.07305					1.98639			R3	0.65696	0.58957		NT	0.410848		GPX2	1.66298						0.80955
R4	0.67626	0.67404	R3	0.96324	0.966943		1.271		R4	1.76697	1.67179		2.02554					R4		1.07568			0.54476			Moyenne	1.18137		GPX 12	1.12422
	0.67188			0.91171			1.274			1.64397			2.09434						1.05937				0.56699						GPX 13	0.77651
	0.67398			1.02588						1.60443		R4	0.51435	0.49759					1.09199			R4	0.41089	0.407223		M- NT1	1.90684		M-GPX1	4.12552
			R4	0.62509	0.64571								0.48935					Mean	0.838845				0.44284			M- NT2	1.292		M-GPX2	1.76753
				0.69164									0.48907										0.36794			NT exp 2	0.39		M-GPX12	2.50422	GPX4
				0.6204																		Mean	0.47334			NT exp 2	0.411		M-GPX13	1.41383			Mean of triplicata			Mean of triplicata
																											0.99996				n=1	NT1	1	n=2	R1	2.33555
Recap (Data on GraphPad Prism)									Recap (Data on GraphPad Prism)												exp 1		exp 2		exp 3							NT2	0.561		R2	1.60087
		NT Mean (wells)			GPX Relapse Mean of wells						NT Mean (wells)			GPX Relapse Mean of wells							Sample ID	Relative Quantity (dRn)	Sample ID	Relative Quantity (dRn)	Sample ID	Relative Quantity (dRn)			Moyenne	Normalized (/Non treated)	n=2	NT5	0.87721		R3	1.23771
n=1	NT1	1	n=1	R1	0.992777				n=1	NT1	1	n=1	R1	2.41867							NT1	1.90684	NT	0.390063	NT 3	0.69609		NT 1	1.14845	1.37783		NT6	1.05642	N=3	R4	1.124
	NT2	0.588607		R2	0.937					NT2	1.08404		R2	3.07352							NT2	1.29225	NT	0.410848	NT 2	1.66591		NT 2	0.851548	1.02162	N=3	NT	0.811		R5	2.788
n=2	NT5	0.60383		R3	0.517323				n=2	NT5	0.715007		R3	2.30772							GPX 1	7.05531	GPX 1	1.19573	NT 5	0.638003		NT 3	0.69609	0.835117		NT	0.575		R6	0.525
	NT6	1.0062		R4	0.67404					NT6	1.19322		R4	1.67179							GPX2	1.87209	GPX2	1.66298	GPX1	1.97972		NT 5	0.638003	0.765429		Mean of NT	0.813439		R7	0.738435
n=3	NT 7	0.767	n=2	R1	1.14203	Mean R1	1.0674		n=3	NT 7	1.011	n=2	R1	1.90655							GPX 3	3.88422	GPX3	1.12422	GPX2	0.763238		Mean non treated	0.833523
	NT 8	0.73		R2	0.54666	Mean R2	0.74183			NT 8	1.451		R2	2.41085							GPX 4	2.05115	GPX 13	0.77651	GPX 3	2.62283		GPX1	3.41025	4.09137
Mean of NT		0.782606		R3	0.966943	Mean R3	0.742133		Moyenne		1.07571		R3	2.07305											GPX 5	2.6		GPX2	1.43277	1.71893
			n=3	R5	1.561	Mean R5	1.561					n=3	R5	2.04577														GPX 3	2.54375	3.05181
				R6	2.042	Mean R6	2.042						R6	2.22398														GPX 4	1.41383	1.69621	GPX4 normalisation
				R7	1.706	Mean R7	1.706						R7	1.09284														GPX 5	2.6	3.11929			NT (Moyenne des triplicats)			GPX Relapse (Moyenne des triplicats)
				R8	1.273	Mean R8	1.273						R8	1.74279																	n=1	NT1	1.23001	n=1	R1	2.87275
NRF2 normalisation									HO-1 normalisation																							NT2	0.690037		R2	1.96908
		NT Mean (wells)			GPX Relapse Mean of wells						NT Mean (wells)			GPX Relapse Mean of wells																	n=2	NT5	1.07898		R3	1.52239
n=1	NT1	1.27778	n=1	R1	1.26855																											NT6	1.29942		R4	1.38253
	NT2	0.752112		R2	1.19728										Mean sample																	NT	0.99754	n=2	R5	3.42927
n=2	NT1	0.771564		R3	0.661027				n=1	NT1	0.929618	n=1	R1	2.24844	2.0104	R1																NT	0.707257		R6	0.645756
	NT2	1.2857			Normalized					NT2	1.00774		R2	2.8572	2.54918	R2																	1.23001		R7	0.908284
	NT5	0.980059	n=2	R1	1.45927	1.36391			n=2	NT5	0.664683		R3	2.14529	2.03622	R3
	NT6	0.932782		R2	0.698513	0.947898				NT6	1.10924		R4	1.55413
				R3	1.23554	0.948285			n=3	NT	0.939843	n=2	R1	1.77236
			n=3	R5	1.99462	1.99462				NT	1.34888		R2	2.24117
				R6	2.60923	2.60923				Moyenne	1		R3	1.92714
				R7	2.1799	2.1799						n=3	R5	1.90178
				R8	1.62662	1.62662							R6	2.06745
													R7	1.01592
													R8	1.62013

## Sheet: PDAC032T Relapse endpoint (B)
Nrf2						HO-1						SLC7a11												GPX4
Experiment 1			Experiment 2			Experiment 1			Experiment 2			Experiment 1			Experiment 2			Experiment 3			Experiment 4			Experiment 1			Experiment 2
Sample ID	Relative Quantity (dRn)	Mean (wells)	Sample ID	Relative Quantity (dRn)	Mean (wells)	Sample ID	Relative Quantity (dRn)	Mean (wells)	Sample ID	Relative Quantity (dRn)	Mean (wells)	Well ID	Relative Quantity (dRn)	Mean of wells	Well ID	Relative Quantity (dRn)	Mean of wells	Well ID	Relative Quantity (dRn)	Mean of wells	Well ID	Relative Quantity (dRn)	Mean of wells	Sample ID	Relative Quantity (dRn)	Mean (wells)	Sample ID	Relative Quantity (dRn)	Mean (wells)
NT 1	1	1	NT 1	1	1	NT 1	1	1	NT 1	1	1	NT 1 LP	1	1	NT 1 LP	1	1	NT 1	1	1	NT 1	1	1	NT 1	1	1	NT 1	1	1
	1			1			1			1			1			1			1			1			1			1
	1		NT 2	1.21792	1.29021		1			1			1			1			1		NT 3	0.26063	0.240035		1		NT 2	2.29594	2.00761
NT 2	1.10965	1.09196		1.3625		NT 2	1.88722	1.76039	NT 2	2.46016	2.29786	NT 2 LP	3.77191	3.61109	NT 2 LP	3.92009	3.67987	NT 2	1	1		0.21944		NT 2		#DIV/0!		2.28987
	1.03584		NT 3	0.12121	0.12304		1.63357			2.20212			3.69256			3.20157			1									1.43702
	1.13038			0.12487						2.23129			3.36881			3.91796											NT 3	0.12613	0.123875
Gem 2	0.29277	0.26321	GEM 1	0.8202	0.84918	Gem 2	0.75549	0.720733	NT 3	0.18169	0.169205	NT 3 LP	0.16368	0.188527	NT 3 LP	0.20383	0.20857	NT 3	0.53354	0.529303	GEM 3	3.85834	3.57892	Gem 2	2.19883	2.41355		0.12162
	0.25472			0.8805			0.77308			0.15672			0.19536			0.21108			0.54138			3.29949			2.57112		GEM 1	3.16657	3.20821
	0.24214			0.84684			0.63363		GEM 1	2.00018	1.80923		0.20654			0.2108			0.51299		GEM 4	1.02136	0.978605		2.47069			3.24985
Gem 3	0.92386	0.870593	GEM 2	0.44103	0.400627	Gem 3		1.8631		1.61827		GEM 4	2.19442	2.42493	GEM 4	0.79111	0.817833	Gem 2	0.9663	0.96103		0.93585		Gem 3	1.56281	1.64456	GEM 2	2.33999	1.95797
	0.84563			0.39529			1.82108		GEM 2	0.86009	0.848075		2.69723			0.76528			1.01469		GEM 2	1.59025	1.45354		1.77433			1.8165
	0.84229			0.36556			1.90512			0.83606			2.38315			0.89711			0.9021			1.30174			1.59655			1.71741
Gem 4	0.3737	0.33972	GEM 3	1.23806	1.11012	Gem 4	0.24656	0.216577	GEM 3	2.16052	2.22104	GEM 2	0.71103	0.629507	GEM 2	0.63805	0.615593	Gem 3	1.33734	1.22176		1.46862		Gem 4	0.183	0.192283	GEM 3	1.50614	1.49034
	0.33903			1.03145			0.2181			2.28155			0.5943			0.61625			1.14672		GEM 3	0.85922	0.827337		0.24129
	0.30643			1.06084			0.18507		GEM 4	0.40655	0.3927		0.58319			0.59248			1.18122			0.86349			0.15256			1.47454
Gem 5	0.36257	0.416843	GEM 4	0.28834	0.28124	Gem 5	0.64097	0.529453		0.38815		GEM 3	1.27525	1.27525	GEM 3	1.44125	1.46056	Gem 5	0.52109	0.468197		0.7593		Gem 5	0.14871	0.15709	GEM 4	0.44739	0.467093
	0.37422			0.27414			0.48027			0.3834						1.47988			0.41417						0.17887			0.57836
	0.51374						0.46712		GEM 5		40.5826								0.46933						0.14369			0.37553
										37.6025		Mean of NT	1.59987		Mean of NT	1.62948		Mean of NT	1		Mean of NT	0.620017					GEM 5	11.8128
Recap										43.5627		Experiment 1			Experiment 2			Experiment 3			Experiment 4
		NT (Moyenne des triplicats)			Gem Relapse (Moyenne des triplicats)	Recap						SLC7a11 normalization												Recap
n=1	NT1	1	n=1	Gem 1				NT (Moyenne des triplicats)			Gem Relapse (Moyenne des triplicats)	NT 1 LP		0.625	NT 1 LP		0.613874	NT 1 LP		1	NT 1 LP		0.0265939			NT (Moyenne des triplicats)		Gem Relapse (Moyenne des triplicats)
	NT2	1.092		Gem 2	0.263	n=1	NT1	1	n=1	Gem 1														n=1	NT1	1	n=1	Gem 1
	NT 3			Gem 3	0.871		NT2	1.76		Gem 2	0.72														NT2			Gem 2	2.414
n=2	NT1	1		Gem 4	0.34		NT 3			Gem 3	1.863	NT 2 LP		2.25693	NT 2 LP		2.25898	NT 2 LP		1	NT 2 LP		0.00638348		NT 3			Gem 3	1.645
	NT2	1.29		Gem 5	0.417	n=2	NT1	1		Gem 4	0.216													n=2	NT1	1		Gem 4	0.192
	NT 3	0.123	n=2	Gem 1	0.849		NT2	2.298		Gem 5	0.529														NT2	2.008		Gem 5	0.157
	M-Nt2	1.191		Gem 2	0.401		NT 3	0.169	n=2	Gem 1	1.809	NT 3 LP		0.117829	NT 3 LP		0.128036	NT 3 LP		0.529303	GEM 2		0.0386553		NT 3	0.124	n=2	Gem 1	3.208
	Moyenne	0.771333		Gem 3	1.11		M-Nt2	2.029		Gem 2	0.848														M-Nt2	2.008		Gem 2	1.958
				Gem 4	0.281		Moyenne nt	0.976333		Gem 3	2.221														Moyenne	1.044		Gem 3	1.49
										Gem 4	0.393	GEM 4		1.51558	GEM 4		0.502046	GEM 2		1.22176	GEM 4		0.026025					Gem 4	0.467
Normalization										Gem 5																		Gem 5	11.8
		NT (Moyenne des triplicats)			Gem Relapse (Moyenne des triplicats)	Normalization																		GPX4
n=1	NT1	1.29702	n=1	Gem 1				NT (Moyenne des triplicats)			Gem Relapse (Moyenne des triplicats)	GEM 2		0.393442	GEM 2		0.377896	GEM 4		0.96103	GEM 3		0.0951775			NT (Moyenne des triplicats)			Gem Relapse (Moyenne des triplicats)
	NT2	1.41634		Gem 2	0.341115	n=1	NT1	1.02459	n=1	Gem 1														n=1	NT1	0.957854	n=1	Gem 1
	NT 3	0		Gem 3	1.1297		NT2	1.80328		Gem 2	0.737705														NT2			Gem 2	2.31226
n=2	NT1	1.29702		Gem 4	0.440986		NT 3	0		Gem 3	1.90881	GEM 3		0.797031	GEM 3		0.896602	GEM 5		0.468197	GEM 3		0.0220021		NT 3			Gem 3	1.57567
	NT2	1.67315		Gem 5	0.540856	n=2	NT1	1.02459		Gem 4	0.221311													n=2	NT1	0.957854		Gem 4	0.183908
	NT 3	0.159533	n=2	Gem 1	1.10117		NT2	2.35451		Gem 5	0.542008														NT2	1.92337		Gem 5	0.150383
	M-Nt2	1.54475		Gem 2	0.520104		NT 3	0.173156	n=2	Gem 1	1.85348	Sample ID	Experiment 1	Experiment 2	Experiment 3-4		Mean of experiments	Mean of Non treated	Normalization/ non treated						NT 3	0.118774	n=2	Gem 1	3.0728
	Moyenne	1.00043		Gem 3	1.43969		M-Nt2	2.07889		Gem 2	0.868852	NT 1 LP	0.625049	0.613692		1.613	0.950581	0.947716	1.00302						M-Nt3	1.92337		Gem 2	1.87548
				Gem 4	0.364462		Moyenne	1.00034		Gem 3	2.27561	NT 2 LP	2.25711	2.25831		0.387142	1.63419		1.72434						Moyenne	1		Gem 3	1.4272
										Gem 4	0.402664	NT 3 LP	0.117838	0.127998	0.529303		0.25838		0.272634									Gem 4	0.447318
	M- NT1	1.29702		M-Gem1	1.10117					Gem 5		GEM 4	1.5157		0.96103	1.57835	1.35169		1.42627									Gem 5
	M- NT2	1.54475		M-Gem2	0.43061		M- NT1	1.02459		M-Gem1	1.85348	GEM 2	0.393473	0.377785	1.22176	2.34435	1.08434		1.14416						M- NT1	0.957854		M-Gem1	3.0728
	M- NT3	0.0797665		M-Gem3	1.2847		M- NT2	1.803		M-Gem2	0.803279	GEM 3	0.797094	0.896337	5.77228	1.33438	2.20002		2.32139						M- NT2	1.92337		M-Gem2	2.09387
	Moyenne NT	0.973843		M-Gem4	0.402724		M- NT3	0.0865779		M-Gem3	2.09221														M- NT3	0.118774		M-Gem3	1.50144
				M-Gem5	0.540856		Moyenne NT	0.971389		M-Gem4	0.311988														Moyenne NT	1		M-Gem4	0.315613
										M-Gem5	0.542008																	M-Gem5	0.150383

## Sheet: PDAC084T UT (C-E)
Nrf2									HO-1									SLC7a11												GPX4										PGC-1α (Figure F)									TFAM (Figure F)
Experiment 1			Experiment 2			Experiment 3			Experiment 1			Experiment 2			Experiment 3			Experiment 1			Experiment 2			Experiment 3			Experiment 4				Experiment 1			Experiment 2			Experiment 3			Experiment 1			Experiment 2			Experiment 3			Experiment 1
Sample ID	Relative Quantity (dRn)	Mean (wells)	Sample ID	Relative Quantity (dRn)	Mean (wells)	Sample ID	Relative Quantity (dRn)	Mean (wells)	Sample ID	Relative Quantity (dRn)	Mean (wells)	Sample ID	Relative Quantity (dRn)	Mean (wells)	Sample ID	Relative Quantity (dRn)	Mean (wells)	Sample ID	Relative Quantity (dRn)	Mean (wells)	Sample ID	Relative Quantity (dRn)	Mean (wells)	Sample ID	Relative Quantity (dRn)	Mean (wells)	Sample ID	Relative Quantity (dRn)	Mean (wells)		Sample ID	Relative Quantity (dRn)	Mean (wells)	Sample ID	Relative Quantity (dRn)	Mean (wells)	Sample ID	Relative Quantity (dRn)	Mean (wells)	Sample ID	Relative Quantity (dRn)	Mean (wells)	Sample ID	Relative Quantity (dRn)	Mean (wells)	Sample ID	Relative Quantity (dRn)	Mean (wells)	Sample ID
NT 1	0.94973	1.00448	NT 1	1	1	NT 1	1	1	NT 1	2.17888	2.11764	NT 1	1	1	NT 1	1	1	NT 1	1	1	NT 1	1	1				NT 1	1	1		NT 1	1	1	NT 1	1	1	NT 1	1	1	NT 1	1	1	NT 1	1	1	AH-IPC 160	1	1	NT 1
	1.02699			1			1			2.0564			1			1			1			1		NT 1	1	1		1				1			1			1			1			1			1
	1.03672			1			1		NT 2	1	1		1			1		NT 2	1.0772	1.05869		1			1			1				1			1			1			1			1			1
NT 2	1	1	NT 2	1.23544	1.18155	NT 2	0.64582	0.667557		1		NT 2	0.5816	0.577453	NT 2	1.08344	1.08742		1.04018		NT 2		0.57857		1		NT 2		0.65136		NT 2		0.913145	NT 2	0.63695	0.915257	NT 2	1.17439	1.01396	NT 2	3.19946	2.948	NT 2		7.67446	AH-IPC 166		40.1042	NT 2
	1			1.15683			0.68424		NT 3	0.68021	0.697117		0.58718			1.0914		NT 3	0.7016	0.67989		0.60591		NT 2	0.59903	0.570063		0.61377				0.95135			1.27612			1.06816			3.17493			8.26177			39.9667
	1			1.15237			0.67261			0.72147			0.56358						0.71397			0.55123			0.49926			0.68895				0.87494			0.8327			0.79933			2.46962			7.08715			40.2418
NT 3	0.91288	0.85426	NT 3	0.84314	0.85858	NT 3	1.29603	1.03073		0.68967		NT 3	0.45263	0.424753	NT 3	1.41617	1.35314		0.6241		NT 3	0.45259	0.45081		0.6119		NT 3	0.73747	0.63991		NT 3	1.09672	1.13831	NT 3	1.03399	1.32526	NT 3	1.27478	1.1089	NT 3	2.37881	2.16261	NT 3	8.37971	7.46301	AH-IPC 169	19.6574	26.84	NT 3
	0.77002			0.90905			0.67486		UT 1	1.15648	1.68849		0.43071			1.49049		UT 1	1.35576	1.57114		0.44277		NT 3	0.74805	0.67816		0.55367										1.10105			2.20162			6.54632			34.0769
	0.87988			0.82355			1.12129			2.2205			0.39092			1.15277			1.49326			0.45707			0.63578			0.62859				1.1799			1.61653			0.95088			1.90739						26.7857
UT 1	0.82367	0.792467	UT 1	0.66624	0.767397	UT 1	0.90745	0.896943	UT 2	1.5067	1.41361	UT 1	0.70768	0.66603	UT 1		1.54824		1.8644		UT 1	1.5213	1.53536		0.65065		UT 1	0.99157	0.965567		UT 1	1.23278	1.28648	UT 1	2.87445	2.79632	UT 1	2.2509	1.5316	UT 1	2.78399	2.74285	UT 1	11.2203	11.0583	AH-IPC 155	169.509	163.576	UT 1
	0.77379			0.76553			1.03443			1.33989			0.63089			1.7171		UT 2	2.00133	1.85933		1.53616		UT 1	1.73994	1.71267		0.99937				1.34019			2.97467			1.04921			3.04401			10.0695
	0.77994			0.87042			0.74895			1.39424			0.65952			1.37937			1.73632			1.54863			1.72944			0.90576							2.53985			1.29468			2.40056			11.8849			157.643
UT 2	0.84179	0.75848	UT 2	0.63589	0.60278	UT 2	0.39838	0.3809	UT 3	0.98216	1.00202	UT 2	0.62535	0.627283	UT 2	1.14059	1.11553		1.84035		UT 2	5.32136	5.29245		1.66862		UT 2	2.43603	2.98247		UT 2	1.1061	1.1088	UT 2	5.30699	4.88318	UT 2	1.84872	2.3188	UT 2	12.4194	11.0821				AH-IPC 158		242.726	UT 2
				0.56967			0.33904			1.03733			0.67104					UT 3	5.61906	4.75433		5.26354		UT 2	1.4826	1.60925		2.71192				1.04609			4.45937			2.99386			9.6396						222.101
	0.67517			0.53402	0.87934		0.40528			0.98657			0.58546			1.09047			5.1313			1.609	1.52664		1.68496			3.79947			UT 3	1.1742	1.1742					2.11381			11.1872						263.351
UT 3	1.20448	1.10752	UT 3	1.083		UT 3	0.715	0.69849	Mean NT	1.27159		UT 3	0.679	0.652	UT 3	0.93707	0.92752		3.51264		UT 3				1.66019		UT 3	0.8823	1.04801		Mean of non treated	1.01715		UT 3	2.42091	2.29834	UT 3	1.24738	1.24564	UT 3	63.7698	59.4752	UT 3	54.9801	48.6514	AH-IPC 167	183.103	189.877	UT 3
	1.01056			1.021			0.70114						0.625			0.90914						1.44428		UT 3	1.74289	1.72769		1.26382							2.41439			1.2439			55.1806			42.3227			233.341
	1.06725		Mean NT	1.01338			0.67933					Mean NT	0.667402			0.93635		Mean NT	0.91286		Mean NT	0.67646			1.78866			0.99792							2.05973		Mean of non treated	1.04095		Mean of non treated	2.03687		Mean of non treated		5.37916		153.186
Mean NT	0.952913					Mean NT		0.899428							Mean NT	1.14685									1.65153		Mean of non treated	0.763757						Mean of non treated	1.08017					PGC1 normalization Exp1			PGC1 normalization Exp1			Mean of non treated	22.6481		Mean of non treated
Nrf2 Normalization								HO-1 Normalization																Mean of non treated	0.749408															NT 1		0.490949	NT 1		0.185903	NT 1		0.044154	PGC1 normalization Exp1
Experiment 1		Experiment 2		Experiment 3				Experiment 1		Experiment 2		Experiment 3						Nrf2 Normalization												Experiment 1		Experiment 2		Experiment 3															NT 1
NT 1	1.05411	NT 1	0.986801	NT 1	1.11182			NT 1	1.66481	NT 1	1.49835	NT 1	0.87184					Experiment 1		Experiment 2		Experiment 3		Experiment 4						NT 1	0.983284	NT 1	0.925926	NT 1	0.960615
																		NT 1	1.09529	NT 1	1.47929	NT 1	1.33511	NT 1	1.30932															NT 2		1.44732	NT 2		1.4267	NT 2		1.77076
																																																	NT 2
NT 2	1.04941	NT 2	1.16595	NT 2	0.742202			NT 2	0.786164	NT 2	0.865225	NT 2	0.948056																	NT 2	0.897881	NT 2	0.84746	NT 2	0.974025
																		NT 2	1.15957	NT 2	0.855873	NT 2	0.761099	NT 2	0.852837															NT 3		1.06173	NT 3		1.38739	NT 3		1.18509
																																																	NT 3
NT 3	0.896472	NT 3	0.847248	NT 3	1.14598			NT 3	0.548048	NT 3	0.636428	NT 3	1.17972																	NT 3	1.11928	NT 3	1.22709	NT 3	1.06523
																		NT 3	0.744677	NT 3	0.666879	NT 3	0.905421	NT 3	0.837845															UT 1		1.3466	UT 1		2.05576	UT 1		7.22253
																																																	UT 1
UT 1	0.831625	UT 1	0.757268	UT 1	0.997238			UT 1	1.32743	UT 1	0.997944	UT 1	1.34981																	UT 1	1.26498	UT 1	2.58919	UT 1	1.47127
																		UT 1	1.72085	UT 1	2.27125	UT 1	2.2866	UT 1	1.26423															UT 2		5.44074				UT 2		10.7173
																																																	UT 2
UT 2	0.795959	UT 2	0.594824	UT 2	0.423491			UT 2	1.11133	UT 2	0.939888	UT 2	0.972563																	UT 2	1.09026	UT 2	4.52146	UT 2	2.22747
																		UT 2	2.03651	UT 2	7.82907	UT 2	2.14853	UT 2	3.905															UT 3		29.1993	UT 3		9.04442	UT 3		8.38381
																																																	UT 3
UT 3	1.16225	UT 3	0.867734	UT 3	0.776594			UT 3	0.787752	UT 3	0.976922	UT 3	0.808649																	UT 3	1.15457	UT 3	2.1281	UT 3	1.19658
																		UT 3	5.20737	UT 3	2.25834	UT 3	2.30667	UT 3	1.37218
								Experiment 1 HO-1		Experiment 2		Experiment 3																												Experiment 1		Experiment 2		Experiment 3					Recap TFAM
EXP 1		EXP 2		EXP 3				NT 1	1.66535	NT 1	1.498	NT 1	0.872																	Experiment 3		Experiment 1		Experiment 2		Normalisation n=3	Mean	normalization
								NT 2	0.78642	NT 2	0.865	NT 2	0.948					Exp 1		Exp 2		Exp 3		Exp 4		Normalisation n=3	Mean	Normalized												NT 1	0.490949	NT 1	0.185903	NT 1	0.0441538				Experiment 1
NT 1	1.054	NT 1	0.987	NT 1	1.112			NT 3	0.548226	NT 3	0.636	NT 3	1.18																	NT 1	0.960657	NT 1	0.983138	NT 1	0.925778	NT 1	0.956524	0.956524		NT 2	1.44732	NT 2	1.4267	NT 2	1.77076				NT 1
NT 2	1.049	NT 2	1.166	NT 2	0.742													NT 1	1.09546	NT 1	1.47828	NT 1	1.33439	NT 1	1.30932	NT 1	1.24639	1.27053		NT 2	0.974068	NT 2	0.897747	NT 2	0.847325	NT 2	0.90638	0.90638		NT 3	1.06173	NT 3	1.38739	NT 3	1.18509				NT 2
NT 3	0.896	NT 3	0.847	NT 3	1.146			UT 1	1.32786	UT 1	0.998	UT 1	1.35					NT 2	1.15975	NT 2	0.855291	NT 2	0.760685	NT 2	0.852837	NT 2	0.907141	0.92471		NT 3	1.06528	NT 3	1.11912	NT 3	1.2269	NT 3	1.1371	1.1371											NT 3
								UT 2	1.11169	UT 2	0.94	UT 2	0.973					NT 3	0.744791	NT 3	0.666425	NT 3	0.904928	NT 3	0.837845	NT 3	0.788497	0.803769								Mean NT	1	1		UT 1	1.3466	UT 1	2.05576	UT 1	7.2225
UT 1	0.831	UT 1	0.757	UT 1	0.997			UT 3	0.788008	UT 3	0.977	UT 3	0.809													Mean NT	0.980675	0.999669		UT 1	1.47134	UT 1	1.26479	UT 1	2.58878	UT 1	1.77497	1.77497		UT 2	5.44074	UT 2	54.404	UT 2	10.7173				UT 1
UT 2	0.795	UT 2	0.594	UT 2	0.423													UT 1	1.72112	UT 1	2.2697	UT 1	2.28536	UT 1	1.26423	UT 1	1.8851	1.92161		UT 2	2.22757	UT 2	1.0901	UT 2	4.52074	UT 2	2.6128	2.6128		UT 3	29.1993	UT 3	9.04442	UT 3	8.38378				UT 2
UT 3	1.162	UT 3	0.867	UT 3	0.777				Mean NT	Normalized								UT 2	2.03682	UT 2	2.25681	UT 2	2.14736	UT 2	3.905	UT 2	2.5865	2.63659		UT 3	1.19663	UT 3	1.1544	UT 3	2.12776	UT 3	1.49293	1.49293											UT 3
Normalisation n=3	Mean	Normalized																UT 3	5.20817	UT 3	7.82374	UT 3	2.30541	UT 3	1.37218	UT 3	2.96192	3.01929													Mean	Normalized
								NT 1	1.34512	1.34512
NT 1	1.051	1.051						NT 2	0.866473	0.866473																														NT 1	0.240335	0.308146
NT 2	0.985667	0.985667						NT 3	0.788075	0.788075																														NT 2	1.54826	1.9851
NT 3	0.963	0.963						Mean NT	0.999889	0.999889																														NT 3	1.2114	1.5532
Mean NT	0.999889	0.999889						UT 1	1.22529	1.22529																														Mean NT	1	1.28215
UT 1	0.861667	0.861667						UT 2	1.00823	1.00823																														UT 1	3.54162	4.54089
UT 2	0.604	0.604						UT 3	0.858003	0.858003																														UT 2	8.079	10.3585
UT 3	0.935333	0.935333																																						UT 3	8.7141	11.1728
[truncated: 6 more columns]

## Sheet: PDAC032T UT (C-E)
Nrf2						HO-1						SLC7a11						GPX4						PGC-1α						TFAM
Experiment 1			Experiment 2			Experiment 1			Experiment 2			Experiment 1			Experiment 2			Experiment 1			Experiment 2			Experiment 1			Experiment 2			Experiment 1			Experiment 2
Sample ID	Relative Quantity (dRn)	Mean (wells)	Sample ID	Relative Quantity (dRn)	Mean (wells)	Sample ID	Relative Quantity (dRn)	Mean (wells)	Sample ID	Relative Quantity (dRn)	Mean (wells)	Sample ID	Relative Quantity (dRn)	Mean (wells)	Sample ID	Relative Quantity (dRn)	Mean (wells)	Sample ID	Relative Quantity (dRn)	Mean (wells)	Sample ID	Relative Quantity (dRn)	Mean (wells)	Sample ID	Relative Quantity (dRn)	Mean (wells)	Sample ID	Relative Quantity (dRn)	Mean (wells)	Sample ID	Relative Quantity (dRn)	Mean (wells)	Sample ID	Relative Quantity (dRn)	Mean (wells)
NT 1	1	1	NT 1	1	1	NT 1	1	1	NT 1	1	1	NT 1	1	1	NT 1	1	1	NT 1	1	1	NT 1	1	1	NT 1	1	1	NT 1	1	1	NT 1	1	1	NT 1	1	1
	1			1			1			1			1			1			1			1			1			1			1			1
	1			1				2.36445		1			1			1			1			1			1						1			1
NT 2		1.03521	NT 2	2.24804	2.07482	NT 2	2.14433		NT 2	2.38187	2.23748	NT 2	2.55623	2.35174	NT 2	2.39985	2.10755	NT 2	1.13896	1.70558	NT 2		1.93113	NT 2	1.49012	1.73429	NT 2	16.9055	16.9064	NT 2	1.35701	1.34603	NT 2		2.41857
	1.09893			1.98398			2.58458			2.10125			2.27808			2.05056			2.27221			2.14657			1.97847			16.9072			1.31355			2.521
	0.9715			1.99243				3.85335		2.22932			2.22091			1.87223						1.71569									1.36754			2.31613
NT 3	1.13698	1.12633	NT 3	2.66449	2.57751	NT 3	3.94692		NT 3	2.70554	2.38003	NT 3		3.27509	NT 3	2.10464	2.0002	NT 3	4.23977	5.00403	NT 3	3.73854	3.83772	NT 3	4.63338	4.59007	NT 3	15.5279	18.3976	NT 3	1.53538	1.3437	NT 3		1.81266
	1.12934			2.62682			3.75978			2.0767			3.3662			1.98396			5.76828						4.96958			21.2674			1.20015			1.68575
	1.11268			2.44123			3.51338	3.55152		2.35784			3.18398			1.91201						3.93691			4.16725						1.29556			1.93958
UT 1	1.36788	1.27545	UT 4	1.78486	1.66382	UT 1	3.5661		UT 4	2.90217	2.79388	UT 1	1.42226	1.35371	UT 4	1.7154	1.61298	UT 1	9.71665	9.22169	UT 4	4.43533	4.33038	UT 1	11.7613	9.60684	UT 4	18.4835	21.3606	UT 1	1.7194	1.6908	UT 4	0.76249	0.735087
	1.2054			1.6046			3.57508			2.5424			1.26376			1.66058			8.17697			4.24241			9.62116			24.8088			1.68222			0.74092
	1.25307			1.60201			4.30252	3.94232		2.93707			1.37512			1.46295			9.77145			4.31339			7.43809			20.7897			1.67079			0.70185
UT 2	0.82988	0.789547	UT 5	1.48314	1.51636	UT 2	4.08242		UT 5	4.35167	3.23216	UT 2	1.68428	1.74854	UT 5	2.43795	2.17038	UT 2	5.18803	6.41019	UT 5	3.75179	3.5962	UT 2	3.51361	3.43307	UT 5	42.811	40.1009	UT 2	0.90851	0.992943	UT 5	1.37071	1.27015
	0.71041			1.57514			3.44203			2.74262			1.94063			1.76029			7.716									37.3908			1.03638			1.22616
	0.82835			1.4908			2.76704	3.06783		2.60218			1.62072			2.3129			6.32653			3.44061			3.35253						1.03394			1.21358
UT 3	0.72114	0.71039	UT 6	1.73431	1.85259	UT 3	3.46018		UT 6	2.06286	1.96814	UT 3	1.81112	1.74351	UT 6	1.55176	1.49238	UT 3	5.32592	5.22663	UT 6	3.53075	2.99006	UT 3	3.52494	3.89851	UT 6	23.4785	24.6494	UT 3	1.27163	1.17703	UT 6	1.17109	0.95067
	0.69964			1.88561			2.97626			1.96385						1.4317						2.85838						25.0249			1.17377			0.80538
				1.93785						1.87771			1.67591			1.49367			5.12734			2.58106			4.27208			25.4449			1.08569			0.87554
mean NT	1.05385		mean NT	1.88411		mean NT	2.40593			1.8725			2.20894			1.70258			2.56987		2.25629				2.44145			12.1013			1.22991			1.74374
Nrf2 Normalization						HO-1 Normalization						SLC7a11 Normalization						GPX4 Normalization						PGC Normalization						TFAM Normalization
	Exp 1		Exp 2				Exp 1		Exp 2				Exp 1		Exp 2				Exp 1		Exp 2				Exp 1		Exp 2				Exp 1		Exp 2
NT 1	0.948902	NT 1	0.530755			NT 1	0.415639	NT 1	0.533903			NT 1	0.452694	NT 1	0.587199			NT 1	0.389105	NT 1	0.443262			NT 1	0.409668	NT 1	0.0826378			NT 1	0.813008	NT 1	0.573394
NT 2	0.982318	NT 2	1.10122			NT 2	0.982759	NT 2	1.1946			NT 2	1.06462	NT 2	1.23755			NT 2	0.663652	NT 2	0.855997			NT 2	0.710485	NT 2	1.3971			NT 2	1.09434	NT 2	1.38679
NT 3	1.06878	NT 3	1.36803			NT 3	1.6016	NT 3	1.2707			NT 3	1.48261	NT 3	1.17452			NT 3	1.94709	NT 3	1.70112			NT 3	1.88041	NT 3	1.52034			NT 3	1.09244	NT 3	1.03937
UT 1	1.21028	UT 4	0.883082			UT 1	1.47615	UT 4	1.49166			UT 1	0.612817	UT 4	0.947138			UT 1	3.58821	UT 4	1.91949			UT 1	3.93562	UT 4	1.7652			UT 1	1.37464	UT 4	0.421495
UT 2	0.749203	UT 5	0.804815			UT 2	1.63858	UT 5	1.72566			UT 2	0.791554	UT 5	1.27445			UT 2	2.49424	UT 5	1.59406			UT 2	1.40642	UT 5	3.31385			UT 2	0.807271	UT 5	0.728297
UT 3	0.674091	UT 6	0.983271			UT 3	1.27511	UT 6	1.0508			UT 3	0.789278	UT 6	0.876322			UT 3	2.03371	UT 6	1.32538			UT 3	1.5971	UT 6	2.03698			UT 3	0.956935	UT 6	0.545109

## Sheet: PDAC084T SR (D-E)
Nrf2 and HO-1 (Figure D)																					GPX4 (Figure D)									SLC7a11 (Figure D)									PGC-1α (Figure E)									TFAM (Figure E)
Experiment 1							Experiment 2							Experiment 3							Experiment 1			Experiment 2			Experiment 3			Experiment 1			Experiment 2			Experiment 3			Experiment 1			Experiment 2			Experiment 3			Experiment 1
	NRF2		HO1					NRF2		HO1					NRF2		HO1
Sample ID	Relative Quantity (dRn)	Mean (wells)	Sample ID	Relative Quantity (dRn)	Mean (wells)		Sample ID	Relative Quantity (dRn)	Mean (wells)	Sample ID	Relative Quantity (dRn)	Mean (wells)		Sample ID	Relative Quantity (dRn)	Mean (wells)	Sample ID	Relative Quantity (dRn)	Mean (wells)		Sample ID	Relative Quantity (dRn)	Mean (wells)	Sample ID	Relative Quantity (dRn)	Mean (wells)	Sample ID	Relative Quantity (dRn)	Mean (wells)	Sample ID	Relative Quantity (dRn)	Mean (wells)	Sample ID	Relative Quantity (dRn)	Mean (wells)	Sample ID	Relative Quantity (dRn)	Mean (wells)	Sample ID	Relative Quantity (dRn)	Mean (wells)	Sample ID	Relative Quantity (dRn)	Mean (wells)	Sample ID	Relative Quantity (dRn)	Mean (wells)	Sample ID	Relative Quantity (dRn)
NT 1	1	1	NT 1	1	1		NT 1	0.98836	0.947963	NT 1	1.02447	0.88934		NT 1	1	1	NT 1	1	1		NT 1	1	1	NT 1	1	1	NT 1	1.17135	1.18566	NT 1	1.33571	1.12625	NT 1	1	1	NT 1	1	1	NT1	1	1	NT1	1	1	NT1	1	1	NT 1	1
	1			1				0.94903			0.83679				1			1				1			1			1.22521			0.88633			1			1			1			1			1			1
	1			1				0.9065			0.80676				1			1				1			1			1.16041			1.15671			1			1			1			1			1			1
NT 2	0.88506	0.8541	NT 2	0.92229	0.872467		NT 2	1	1	NT 2	1	1		NT 2	1.02856	1.00533	NT 2	1.22127	1.13443		NT 2	0.60642	0.643463	NT 2	1.17439	1.01396	NT 2	1.42712	1.26475	NT 2	1	1	NT 2	1.16268	1.21657	NT 2	1.06419	0.978303	NT2	0.55776	0.75257	NT2	1.40898	1.37851	NT2	1.3366	1.07634	NT 2	0.857
	0.8804			0.88284				1			1				0.98117			1.18701				0.75386			1.06816			1.40236			1			1.38436			0.9978			0.95888			1.51006			1.08143			0.84259
	0.79684			0.81227				1			1				1.00626			0.99501				0.57011			0.79933			0.96478			1			1.10267			0.87292			0.74107			1.21648			0.811			0.78603
NT 3	0.89507	0.91546	NT 3	0.88868	0.80292		NT 3	1.00328	0.877513	NT 3	1.06784	0.782657		NT 3	1.12307	1.03233	NT 3	1.11302	1.03549		NT 3	0.5379	0.571863	NT 3	1.27478	1.1089	NT 3	1	1	NT 3	1.42272	1.25834	NT 3	0.98106	0.985477	NT 3	0.94357	0.897717	NT3	3.17455	2.69516	NT3	1.15165	0.776477	NT3	1.02158	0.907713	NT 3	1.32753
	0.90671			0.83311				0.79363			0.75556				0.9285			1.04996				0.58289			1.10105			1			1.133			0.92733			0.86976			2.86074			0.25366			0.83593			1.28136
	0.9446			0.68697				0.83563			0.52457				1.04541			0.94348				0.5948			0.95088		SR 1	1.5204	1.48578		1.21931			1.04804			0.87982			2.05018			0.92412			0.86563			1.14575
SR 1	0.77735	0.753455	SR 1	0.89594	0.977605		NT 4	1.11818	1.05944	NT 4	1.43911	1.28554		NT 4	0.7722	1.17094	NT 4	1.06995	0.98563		NT 4	0.44239	0.49719	SR 1	2.2509	1.5316		1.80389		SR 1	2.07232	2.18149	NT 4	1.16698	1.01825	NT 4	0.94703	0.850503	NT4	3.81456	2.6874	NT4	1.01714	1.06661	NT 4	1.03967	0.88545	SR	1.69874
	0.72956			1.05927				1.03827			1.28235				1.56967			0.98538				0.4943			1.04921			1.13305			2.22775			0.93599			0.83487			2.20294			1.02266			0.73123			1.52348
SR 2	0.66969	0.608433	SR 2	1.62989	1.68443			1.02186			1.13515			SR 1	1.33269	0.93835		0.90156				0.55488			1.29468		SR 1	1.22741	1.35669		2.24441			0.95177			0.76961			2.04471			1.16003		SR1	15.298	12.2652		1.74517
	0.58396			1.79891			SR 1	1.09974	1.04142	SR 1	2.45584	2.23443			0.54401		SR 1	1.97815	1.83937		SR 1	1.77943	1.68065	SR 2	1.84872	2.3188		1.42423		SR 2	2.83831	2.56515	SR 1	1.828	1.77811	SR 1	1.99775	1.77064	SR1	9.35944	9.38802	SR1	15.36	13.4514		9.1463		SR	2.11844
	0.57165			1.6245				1.06166			2.18866			SR 2	1.30753	1.13054		2.03564				1.81739			2.99386			1.41843			2.45186			1.70622			1.87883			9.69675			13.1615			12.3512			2.06956
SR 3	1.07437	0.95647	SR 3	1.16619	1.24791			0.96285			2.0588				1.0486			1.50433				1.44512			2.11381		SR 3	1.53824	1.45331		2.40527			1.8001			1.43534			9.10788			11.8325		SR2	13.2658	12.9108		1.92247
	0.95281			1.19958			SR 2	1.12164	1.1512	SR 2	2.86619	2.67968			1.03549		SR 2	3.42684	3.04975		SR 2	1.13059	1.04377	SR 3	1.24738	1.24564		1.36837		SR 3	3.48731	3.52164	SR 2	2.79113	2.74837	SR 2	2.17696	2.01476	SR2	10.1587	9.63777	SR2	13.8182	12.8696		14.2794		SR	1.43619
	0.84223			1.37796				1.19733			2.68641			SR 3	1.17458	1.08911		3.00525				1.05351			1.2439		Mean NT		1.15014		3.55597			2.8365			2.06314			9.53503			13.8626			11.1872			1.43745
Mean NT	0.923187		Mean NT	0.891796				1.13463			2.48643				1.07264			2.71716				0.94721		Mean NT		1.04095				Mean NT		1.1282		2.61747			1.80419			9.2196			10.9279		SR3	9.37188	9.94545		1.47041
Nrf2 normalization		HO-1 normalization					SR 3	0.78255	0.719193	SR 3	2.30499	1.90582			1.02011		SR 3	2.032	1.79412		SR 3	0.97991	1.05995										Mean NT		1.05507	SR 3	2.36524	2.16812	SR3	0.87998	0.92334	SR3	16.9195	13.4924		9.2051		Mean NT	1.0267
NT 1	1.0832	NT 1	1.12133					0.68872			2.05919			SR 4		0.66376		1.75654				1.11612															2.0839			0.93268			11.4913			11.2594
								0.68631			1.35328				0.70482			1.59382				1.08383															2.05522			0.95736			12.0663		SR4	11.5096	11.1922
							SR 4	0.82451	0.832897	SR 4	2.9588	2.65417			0.6227		SR 4	2.06815	1.93348		SR 4	1.32849	1.18806													SR 4	2.04583	2.07664	SR4	3.96118	3.36488	SR4	17.9985	11.829		10.8749
NT 2	0.925165	NT 2	0.978326					0.88717			2.69348			Mean NT		1.05215		1.84112				0.96904															2.10745			3.37272			11.3486
								0.78701			2.31022							1.89118				1.26666														Mean NT		0.931631		2.76075			6.13979		Mean NT		0.967377
							Mean NT		0.971228	Mean NT		0.989383					Mean NT		1.03889		Mean NT		0.678129																Mean NT		1.78378	Mean NT		1.0554
NT 3	0.99163	NT 3	0.900341																												SLC7a11 Normalization																	PGC-1α Normalization
							Nrf2 normalization		HO-1 normalization					Nrf2 normalization		HO-1 normalization					GPX4 Normalization										Experiment 1		Experiment 2		Experiment 3				PGC-1α Normalization									Experiment 1
							NT 1	0.976046	NT 1	0.898883				NT 1	0.950437	NT 1	0.962569				Experiment 1		Experiment 2		Experiment 3						NT 1	0.998449	NT 1	0.947867	NT 1	1.07296			Experiment 1		Experiment 2		Experiment 3					NT 1	0.97371
SR 1	0.816146	SR 1	1.09622																		NT 1	1.47465	NT 1	0.960657	NT 1	1.03088													NT 1	0.560606	NT 1	0.947867	NT 1	1.03372
							NT 2	1.02962	NT 2	1.01073				NT 2	0.955503	NT 2	1.09197														NT 2	0.886525	NT 2	1.15315	NT 2	1.04968												NT 2	0.806758
SR 2	0.659058	SR 2	1.88881																		NT 2	0.94888	NT 2	0.974068	NT 2	1.09965													NT 2	0.421896	NT 2	1.30664	NT 2	1.11264
							NT 3	0.903509	NT 3	0.791055				NT 3	0.981161	NT 3	0.996727														NT 3	1.11555	NT 3	0.934101	NT 3	0.963215												NT 3	1.21864
SR 3	1.03605	SR 3	1.39932																		NT 3	0.843296	NT 3	1.06528	NT 3	0.869462													NT 3	1.51092	NT 3	0.735997	NT 3	0.938325
							NT 4	1.09082	NT 4	1.29933				NT 4	1.1129	NT 4	0.948737								SR 1	1.29183					SR 1	1.93395	NT 4	0.965163	NT 4	0.912557												SR	1.61227
Recapitulation (n=3)																					NT 4	0.733179	SR 1	1.47134															NT 4	1.50658	NT 4	1.011	NT 4	0.91531
Nrf2	EXP 1	EXP 2	EXP 3	Average	Normalization
NT 1	1.0832	0.976046	0.950437	1.00323	1.1289		SR 1	1.07227	SR 1	2.25841				SR 1	0.891842	SR 1	1.77052								SR 1	1.17959					SR 2	2.27407	SR 1	1.68541	SR 1	1.89983												SR	1.98327
NT 2	0.925165	1.02962	0.955503	0.970097	1.09162																SR 1	2.47836	SR 2	2.22757															SR 1	5.26299	SR 1	12.7501	SR 1	12.6788
NT 3	0.99163	0.903509	0.981161	0.958767	1.07887
NT 4		1.09082	1.1129	1.10186	1.23988		SR 2	1.1853	SR 2	2.70843				SR 2	1.07451	SR 2	2.93559								SR 3	1.26359					SR 3	3.12202	SR 2	2.60509	SR 2	2.16176												SR	1.40995
																					SR 2	1.53919	SR 3	1.19663															SR 2	5.403	SR 2	12.1987	SR 2	13.3462
SR 1	0.816146	1.07227	0.891842	0.926752	1.04284
SR 2	0.659058	1.1853	1.07451	0.972956	1.09483		SR 3	0.740499	SR 3	1.92627				SR 3	1.03513	SR 3	1.72696																		SR 3	2.32631
SR 3	1.03605	0.740499	1.03513	0.937227	1.05463																SR 3	1.56306																	SR 3	0.51763	SR 3	12.789	SR 3	10.2808
SR 4		0.85757	0.630862	0.744216	0.83744
Mean of NT				1.00849			SR 4	0.85757	SR 4	2.68265				SR 4	0.630862	SR 4	1.86111																		S4	2.22904
HO-1	EXP 1	EXP 2	EXP 3																		SR 4	1.75197																	SR 4	1.88638	SR 4	11.2123	SR 4	11.5697
NT 1	1.12133	0.898883	0.962569	0.994262	0.721546																									Recapitulation of SLC7a11
NT 2	0.978326	1.01073	1.09197	1.02701	0.74531																										Experiment 1		Experiment 2		Experiment 3		Mean NT	Mean SR
NT 3	0.900341	0.791055	0.996727	0.896041	0.650266															Recapitulation of GPX4											NT 1	0.998274	NT 1	0.886369	NT 1	1.07339	0.98601	1.9171	Recapitulation of PGC-1α									Recapitulation of TFAM
NT 4		1.29933	0.948737	1.12403	0.815723															EXP 1		EXP 2		EXP 3		NT 1	1.1554	1.20857			NT 2	0.886369	NT 2	1.07833	NT 2	1.0501	1.00493	2.29079	EXP 1		EXP 2		EXP 3				Normalization	EXP 1
SR 1	1.09622	2.25841	1.77052	1.70838	1.23979															Sample ID	Normalized	Sample ID	Normalized	Sample ID	Normalized	NT 2	1.00753	1.05391			NT 3	1.11536	NT 3	0.873496	NT 3	0.963597	0.98415	2.72435	NT 1	0.94751	NT 1	1.03372	NT 1	0.560606	NT 1	0.84728	0.84728
SR 2	1.82459	2.70843	2.93559	2.48954	1.80668															NT 1	1.47465	NT 1	0.960657	NT 1	1.03088	NT 3	0.926011	0.968631			SR 1	1.93361	NT 4	0.902543	NT 4	0.912919	0.907731	2.22904	NT 2	1.30615	NT 2	1.11264	NT 2	0.421896	NT 2	0.946895	0.946895	NT 1	1.3258
SR 3	1.35174	1.92627	1.72696	1.66833	1.21072															NT 2	0.94888	NT 2	0.974068	NT 2	1.09965	NT 4	0.733179	0.766924			SR 2	2.27367	SR 1	1.57606	SR 1	1.90058	0.970706		NT 3	0.735719	NT 3	0.938325	NT 3	1.51092	NT 3	1.06166	1.06166	NT 2	0.915595
SR 4		2.68265	1.86111	2.27188	1.64873															NT 3	0.843296	NT 3	1.06528	NT 3	0.869462	SR 1	1.74718	1.82759			SR 3	3.12147	SR 2	2.43607	SR 2	2.16262	Normalization		NT 4	1.01062	NT 4	0.91531	NT 4	1.50658	NT 4	1.14417	1.14417	NT 3	0.758607
Mean of NT				1.01034																NT 4	0.733179	SR 1	1.47134	SR 1	1.29183	SR 2	1.64878	1.72467							SR 3	2.32723	1.01577	1.97495	SR 1	12.7453	SR 1	12.6788	SR 1	5.26299	SR 1	10.229	10.229	SR	1.51604
																				SR 1	2.47836	SR 2	2.22757	SR 2	1.17959	SR 3	1.34109	1.40282							SR 4	2.22904	1.03526	2.35992	SR 2	12.194	SR 2	13.3462	SR 2	5.403	SR 2	10.3144	10.3144	SR	1.86491
																				SR 2	1.53919	SR 3	1.19663	SR 3	1.26359	SR 4	1.75197	1.83261									1.01385	2.80657	SR 3	12.7841	SR 3	10.2808	SR 3	0.51763	SR 3	7.86087	7.86087	SR	1.14591
																				SR 3	1.56306					Mean NT	0.95553										0.935124	2.29631	SR 4	11.2081	SR 4	11.5697	SR 4	1.88638	SR 4	8.22137	8.22137
																				SR 4	1.75197																								Mean NT	1
[truncated: 7 more columns]

## Sheet: PDAC032T SR (D-E)
HO-1 and Nrf2 (Figure D)														GPX4 and SLC7a11 (Figure D)																					PGC-1α and TFAM (Figure E)
Experiment 1							Experiment 2							Experiment 1							Experiment 2							Experiment 3							Experiment 1							Experiment 2							Experiment 3
	HO-1		Nrf2					HO-1		Nrf2					GPX4		SLC7a11					GPX4		SLC7a11					GPX4		SLC7a11					PGC-1α		TFAM					PGC-1α			TFAM
Sample ID	Relative Quantity (dRn)	Mean (wells)	Sample ID	Relative Quantity (dRn)	Mean (wells)		Sample ID	Relative Quantity (dRn)	Mean (wells)	Sample ID	Relative Quantity (dRn)	Mean (wells)		Sample ID	Relative Quantity (dRn)	Mean (wells)	Sample ID	Relative Quantity (dRn)	Mean (wells)		Sample ID	Relative Quantity (dRn)	Mean (wells)	Sample ID	Relative Quantity (dRn)	Mean (wells)		Sample ID	Relative Quantity (dRn)	Mean (wells)	Sample ID	Relative Quantity (dRn)	Mean (wells)		Sample ID	Relative Quantity (dRn)	Mean (wells)	Sample ID	Relative Quantity (dRn)	Mean (wells)		Sample ID	Relative Quantity (dRn)	Mean (wells)	Sample ID	Relative Quantity (dRn)	Mean (wells)		Sample ID
NT 1	1	1	NT 1	1	1		NT 1	1	1	NT 1	1	1		NT 1	1	1	NT 1	1	1		NT 1	1	1	NT 1	1	1		NT 1	1	1	NT 1	1	1		NT 1	1	1	NT 1	1	1		NT 1	1	1	NT 1	1	1		NT 1
	1			1				1			1				1			1				1			1				1			1				1			1				1			1
	1			1				1			1				1			1				1			1				1			1				1			1				1			1
NT 2	3.67985	3.57411	NT 2	1.44715	1.425		NT 2	4.32096	4.18403	NT 2	2.9239	2.86178		NT 2	0.22652	0.157485	NT 2	1.69065	1.74565		NT 2	15.1404	14.1059	NT 2	1.25549	1.27436		NT 2	2.26712	2.29349	NT 2	2.48972	2.42787		NT 2	68.473	62.1852	NT 2		2.55537		NT 2	1.06321	1.03516	NT 2	1.58016	1.26902		NT 2
	3.40535			1.7788				4.04709			2.73414				0.08845							15.9723							2.31986							55.8974			2.54948				0.81716			1.08221
	3.63713			1.04905							2.92729							1.80066				11.2049			1.29323							2.36601							2.56126				1.2251			1.14468
NT 3	6.49129	5.98568	NT 3	2.90671	2.77829		NT 3	1.51757	1.33685	NT 3		2.44844		NT 3	0.51433	0.87057	NT 3		1.71353		NT 3	25.0137	25.7365	NT 3		1.29575		NT 3	4.87625	5.09488	NT 3	1.48726	1.32578		NT 3	200.659	173.251	NT 3		2.16337		NT 3	1.49489	2.7403	NT 3	1.48357	1.26096		NT 3
	5.48007			2.65502							2.58551				1.22681			1.77851				26.4593			1.29602							1.16431				105.778			2.33581				3.98571			1.18529
				2.77313				1.15613			2.31137							1.64855							1.29549				5.31351							213.317			1.99093							1.11401
SR 1	2.89	2.75788	SR 1	2.29232	1.67376					NT 4	3.26883	3.22665		SR 6	2.03303	3.99249	SR 6	2.24403	2.29966		SR 6	13.6733	14.7508	SR 6	0.31473	0.326897		SR 4		9.03863	SR 4	4.73881	5.04016		NT 4	235.371	245.848	NT 4	1.95323	1.99868		NT 4	1.63975	1.55136	NT 4		1.38437		SR 6
				1.53491							3.18885				4.63158							15.8284			0.34244				10.686			5.00144				217.941			2.03558				1.46296			1.4199
	2.62577			1.19404							3.22227				5.31286			2.35528							0.32352				7.39129			5.38023				284.233			2.00723							1.34884
SR 2	11.466	12.0369	SR 2	1.69846	1.48766		SR 4	8.19322	5.83861	SR 4	2.98209	2.77499		SR 7	11.4672	14.303	SR 7	2.19292	1.79046		SR 7	14.4563	15.6157	SR 7	0.63019	0.6761		SR 5	11.8831	10.8069	SR 5	2.44461	2.50373		SR 4	309.999	383.753	SR 4	1.7719	1.71667		SR 4	5.72824	5.44181	SR 1	0.49733	0.528217		SR 7
	12.6078			1.18157				5.29663			2.60626				17.1387			1.7536				17.7766			0.72201				10.9697			2.43432				369.115			1.77027				5.61327			0.51368
				1.58296				4.02597			2.73663							1.42486				14.6143							9.56775			2.63226				472.144			1.60784				4.98391			0.57364
SR 3	5.68352	4.80095	SR 3	1.17393	1.12805		SR 5	3.29468	4.14747	SR 5	3.44283	3.47419		SR 8	4.1411	3.52307	SR 8	0.88751	0.800407		SR 8	25.2755	25.3496	SR 8	0.89525	1.17684									SR 5	414.736	385.543	SR 5	1.65285	1.70708		SR 5	6.53324	6.61584	SR 2	1.00538	0.94177		SR 8
	4.2466			1.08218				5.5642							2.90505			0.73575				25.4237			1.77649											356.351			1.76131				6.69843			0.85598
	4.47272							3.58354			3.50556							0.77796							0.85877																					0.96395
Mean of NT	3.51993		Mean of NT	1.73443			Mean of NT	2.17362		Mean of NT	2.38422			Mean of NT	0.676018		Mean of NT	1.48639			Mean of NT	13.6141		Mean of NT	1.19004			Mean of NT	2.79612		Mean of NT	1.58455			Mean NT	120.571		Mean NT	1.92936			Mean NT	1.5817		Mean NT	1.22859			Moyenne des NT LP
HO-1 normalization			Nrf2 normalisation				HO-1 normalization			Nrf2 normalisation				GPX4 normalization			SLC7a11 normalization				GPX4 normalization			SLC7a11 normalization				GPX4 normalization			SLC7a11 normalization				PGC-1α normalization			TFAM normalization				PGC-1α normalization			TFAM normalization				PGC-1α normalization
	NT 1	0.284097		NT 1	0.576559			NT 1	0.460061		NT 1	0.419425			NT 1	1.47925		NT 1	0.672769			NT 1	0.0734531		NT 1	0.840309			NT 1	0.357638		NT 1	0.631094			NT 1	0.00829386		NT 1	0.518308			NT 1	0.63223		NT 1	0.813944
	NT 2	1.01539		NT 2	0.821596			NT 2	1.92491		NT 2	1.2003			NT 2	0.23296		NT 2	1.17442			NT 2	1.03612		NT 2	1.07086			NT 2	0.820239		NT 2	1.53221			NT 2	0.515755		NT 2	1.32447			NT 2	0.654457		NT 2	1.03291
	NT 3	1.70051		NT 3	1.60185			NT 3	0.615032		NT 3	1.02694			NT 3	1.28779		NT 3	1.15281			NT 3	1.89043		NT 3	1.08883			NT 3	1.82212		NT 3	0.836695			NT 3	1.43692		NT 3	1.12129			NT 3	1.7325		NT 3	1.02635
	SR 1	0.783506		SR 1	0.965019						NT 4	1.35334			SR 6	5.90589		SR 6	1.54714			SR 6	1.08349		SR 6	0.274694			SR 4	3.23256		SR 4	3.18081			NT 4	2.03903		NT 4	1.03593			NT 4	0.980813		NT 4	1.1268
	SR 2	3.41964		SR 2	0.857725			SR 4	2.68611		SR 4	1.1639			SR 7	21.1577		SR 7	1.20457			SR 7	1.14702		SR 7	0.568133			SR 5	3.86494		SR 5	1.58009			SR 4	3.18279		SR 4	0.889764			SR 4	3.44047		SR 1	0.429939
	SR 3	1.36393		SR 3	0.65039			SR 5	1.90809		SR 5	1.45716			SR 8	5.21151		SR 8	0.538489			SR 8	1.86201		SR 8	0.988907										SR 5	3.19764		SR 5	0.884793			SR 5	4.18273		SR 2	0.766548
HO-1 (n=2)							Nrf2 (n=2)								GPX4 (n=3)								SLC7a11 (n=3)																					PGC-1α (n=3)
non treated	Experiment 1	NT 1	0.284	Mean of NT	Normalization		non treated	Experiment 1	NT 1	0.577		Mean	Normalization										non treated	Experiment 1	NT 1	0.84		Mean	Normalization															non treated	Experiment 1	NT 1	0.008		Mean
		NT 2	1.015						NT 2	0.822					non treated	Experiment 1	NT 1	0.073		Mean	Normalization				NT 2	1.071	NT 1	0.714667	0.714667																	NT 2	0.516	NT 1	0.593
		NT 3	1.701	0.372	0.372				NT 3	1.602	NT 1	0.498	0.476954				NT 2	1.036	NT 1	0.636667	0.776423				NT 3	1.089	NT 2	1.259	1.259																	NT 3	1.437	NT 2	0.476667
SR		SR 1	0.784	1.47	1.47		SR		SR 1	0.965	NT 2	1.011	0.968275				NT 3	1.89	NT 2	0.6345	0.6345		SR		SR 1	0.275	NT 3	1.02633	1.02633															SR		NT 4	2.039	NT 3	1.58967
		SR 2	3.42	1.158	1.158				SR 2	0.858	NT 3	1.3145	1.25895		SR		SR 1	1.083	NT 3	1.66667	1.66667				SR 2	0.568	NT 4																			SR 1	3.183	NT 4	1.51
		SR 3	1.364	1					SR 3	0.65	NT 4	1.353	1.29582				SR 2	1.147	NT 4	0.82					SR 3	0.989	Mean NT	1	1																	SR 2	3.198	Mean NT	1.04233
non treated	Experiment 2	NT 1	0.46				non treated	Experiment 2	NT 1	0.419		1.04412					SR 3	1.862	Mean NT	0.697056			non treated	Experiment 2	NT 1	0.673	SR 1	0.275	0.275															non treated	Experiment 2	NT 1	0.632	SR 4	3.3115
		NT 2	1.925						NT 2	1.2	SR 1	1.31583	1.26023		non treated	Experiment 2	NT 1	1.479	SR 1	1.083	1.55368				NT 2	1.174	SR 2	0.568	0.568																	NT 2	0.654	SR 5	3.6905
		NT 3	0.615						NT 3	1.027	SR 2	0.839	0.803544				NT 2	0.233	SR 2	1.147	1.64549				NT 3	1.153	SR 3	0.989	0.989																	NT 3	1.732	SR 6	1.514
SR		SR 4	2.686						NT 4	1.353	SR 3	#REF!	#REF!				NT 3	1.288	SR 3	1.862	2.67124		SR		SR 6	1.547	SR 4	3.181	3.181																	NT 4	0.981	SR 7	0.973
		SR 5	1.908				SR		SR 4	1.164	SR 4	1.164	1.11481		SR		SR 6	5.906	SR 4	3.233	4.63808				SR 7	2.65	SR 5	1.58	1.58															SR		SR 4	3.44	SR 8	2.171
									SR 5	1.457	SR 5	1.457	1.39543				SR 7	21.16	SR 5	3.865	5.54475				SR 8	1.18	SR 6	1.547	1.547																	SR 5	4.183
																	SR 8	5.21	SR 6	5.906	8.47278		non treated	Experiment 3	NT 1	0.631	SR 7	2.65	2.65
															non treated	Experiment 3	NT 1	0.358	SR 7	21.16	30.3563				NT 2	1.532	SR 8	1.18	1.18															non treated	Experiment 3	NT 1	1.139
																	NT 2		SR 8	5.21	7.4743				NT 3	0.837																				NT 2	0.26
																	NT 3	1.822							NT 4																					NT 3	1.6
																	NT 4	0.82					SR		SR 4	3.181																		SR		SR 6	1.514
															SR		SR 4	3.233							SR 5	1.58																				SR 7	0.973
																	SR 5	3.865																												SR 8	2.171
[truncated: 8 more columns]
